# Supplementary material for: Improved complexation between dibenzo-24-crown-8 derivatives and dibenzylammonium salts by ion-pair recognition
Source: Royal Society of Chemistry journal article supplement (doi:10.1039/b813175a), 2008-01-01
Supplement: b813175a.pdf [file b813175a.pdf]

# Improved complexation between dibenzo-24-crown-8 derivatives and dibenzylammonium salts by ion-pair recognition

Kelong Zhu, Mingming Zhang, Feng Wang, Ning Li, Shijun Li and Feihe Huang\*

*Department of Chemistry, Zhejiang University, Hangzhou 310027, P. R. China.*

*Tel and Fax: 86 571 8795 3189; E-mail: fhuang@zju.edu.cn*

## Electronic Supplementary Information (27 pages)

|                                                                                                                                                                                                                               |         |
|-------------------------------------------------------------------------------------------------------------------------------------------------------------------------------------------------------------------------------|---------|
| 1. <i>Materials and methods</i>                                                                                                                                                                                               | S2      |
| 2. <i>Synthesis of 5-(phthalimidomethyl)-1,2-phenylene-o-phenylene-24-crown-8 (5)</i>                                                                                                                                         | S2      |
| 3. <i>Synthesis of 5-aminomethyl-1,2-phenylene-o-phenylene-24-crown-8 (6)</i>                                                                                                                                                 | S2      |
| 4. <i>Synthesis of 5-methylene-(N'-phenylureylene)-1,2-phenylene-o-phenylene- 24-crown-8 (2a)</i>                                                                                                                             | S3      |
| 5. <i>Synthesis of compound 2b</i>                                                                                                                                                                                            | S3      |
| 6. <i>Synthesis of compound 2c</i>                                                                                                                                                                                            | S4      |
| 7. <i><sup>1</sup>H and <sup>13</sup>C NMR spectra of 5, 6, 2a, 2b and 2c</i>                                                                                                                                                 | S4– S9  |
| 8. <i>Determination of association constants of 1•3a, 1•3b, 1•3c, 2a•3a, 2a•3b, 2a•3c, 2b•3a, 2b•3b, 2b•3c, 2c•3a, 2c•3b and 2c•3c from integrations of complexed and uncomplexed peaks in 1:1 host and guest solutions..</i> | S9–S17  |
| 9. <i>ESI-MS spectra of 5, 6, 2a, 2b and 2c</i>                                                                                                                                                                               | S18–S22 |
| 10. <i>ESI-MS spectra of equimolar acetonitrile solutions of 2a with 3b or 3c</i>                                                                                                                                             | S23–S26 |

### 1. Materials and methods

All reagents were purchased from commercial suppliers and used as received. Dibenzo-24-crown-8 (**1**) was purchased from Acros. Compound **4**<sup>S1</sup> and secondary ammonium salts **2**<sup>S2, S3</sup> were synthesized according to literature procedures. The intermediates **5** and **6** were synthesized according to a similar method reported by Gibson et al.<sup>S4</sup> Solvents were either employed as purchased or dried according to procedures described in the literature. NMR spectra were recorded on a Bruker Advance DMX 500 spectrophotometer or a Bruker Advance DMX 400 spectrophotometer. Low-resolution electrospray ionization mass spectra were recorded on a Bruker Esquire 3000 Plus spectrometer. High-resolution mass spectrometry experiments were performed on a Bruker Daltonics Apex III spectrometer. C, H, and N were analyzed on a Carlo Erba 1110 elemental analyzer. The  $K_a$  values of **1·3** and **2·3** complexes, slow-exchange complexation systems, were calculated from integrations of complexed and uncomplexed peaks in 2.00 mM host and guest solutions.

### 2. Synthesis of 5-(phthalimidomethyl)-1,2-phenylene-o-phenylene-24-crown-8 (**5**)

A solution of **4**<sup>S1</sup> (1.12 g, 2.25 mmol), potassium phthalimide (2.00 g, 10.8 mmol) and DMF (50.0 ml) was held at 90 °C for 24 hr and then cooled to room temperature. The solvent was evaporated under reduced pressure. The residue was dissolved in 200 mL of CH<sub>2</sub>Cl<sub>2</sub> and washed with 100 mL of water twice. The organic layer was dried over anhydrous Na<sub>2</sub>SO<sub>4</sub> and evaporated in vacuo to afford the crude product which was isolated by flash column chromatography using the EtOAc as the eluent to afford 900 mg (66%) of **5**. <sup>1</sup>H NMR (400 MHz, CDCl<sub>3</sub>, 22 °C):  $\delta$  7.83 (2 H, m), 7.69 (2 H, m), 6.98 (2 H, m), 6.84–6.89 (4 H, m), 6.78 (1 H, m), 4.74 (2 H, s), 4.09–4.14 (8 H, m), 3.87–3.89 (8 H, m), 3.80 (8 H, s). <sup>13</sup>C NMR (100 MHz, CDCl<sub>3</sub>, 22 °C):  $\delta$  168.0, 148.9, 148.9, 148.5, 133.9, 132.1, 129.6, 123.3, 121.8, 121.4, 114.6, 114.1, 114.1, 113.8, 69.9, 69.8, 69.5, 69.4, 41.3. Low-resolution ESI-MS:  $m/z$  625.6 (84%) [**5** + NH<sub>4</sub>]<sup>+</sup>, 630.6 (100%) [**5** + Na]<sup>+</sup> and 646.6 (17%) [**5** + K]<sup>+</sup>. Anal. Calcd. for C<sub>33</sub>H<sub>37</sub>NO<sub>10</sub>: C, 65.23; H, 6.14; N, 2.31. Found: C, 65.24; H, 6.12; N, 2.30.

### 3. Synthesis of 5-aminomethyl-1,2-phenylene-o-phenylene-24-crown-8 (**6**)

A solution of **5** (607 mg, 1.00 mmol), hydrazine monohydrate (0.500 mL, 8.50 mmol) and methanol (10.0 mL) was refluxed for 17 hours, cooled, concentrated by rotary evaporation and a white solid was obtained. The mixture was filtered and the solid was washed with 2.00 mL of methanol twice. The combined filtrate was neutralized by 2.00 M NaOH and extracted with CHCl<sub>3</sub>. The combined extracts

were dried over anhydrous  $\text{Na}_2\text{SO}_4$  and evaporated in vacuo to afford **6** (400 mg, 84%) as a light yellow oil.  $^1\text{H}$  NMR (400 MHz,  $\text{CDCl}_3$ , 22 °C)  $\delta$  6.85–6.89 (5 H, m), 6.80 (2 H, s), 4.12–4.16 (8 H, m), 3.90–3.93 (8 H, m), 3.80–3.83 (10 H, m).  $^{13}\text{C}$  NMR (100 MHz,  $\text{CDCl}_3$ , 22 °C)  $\delta$  148.6, 147.4, 121.2, 119.6, 113.8, 113.0, 70.9, 69.6, 69.2, 69.0. Low-resolution ESI-MS:  $m/z$  478.3 (24%) [**6** +  $\text{H}$ ] $^+$ , 500.3 (100%) [**5** +  $\text{Na}$ ] $^+$  and 516.2 (17%) [**5** +  $\text{K}$ ] $^+$ . High-resolution ESI-MS:  $m/z$  calcd for [**6** +  $\text{H}$ ] $^+$   $\text{C}_{25}\text{H}_{36}\text{NO}_8$ , 478.2441, found 478.2437, error –0.8 ppm and calcd for [**6** +  $\text{Na}$ ] $^+$   $\text{C}_{25}\text{H}_{35}\text{NO}_8\text{Na}$  500.2260, found 500.2257, error –0.6 ppm.

#### 4. Synthesis of 5-methylene-(*N'*-phenylureylene)-1,2-phenylene-*o*-phenylene- 24-crown-8 (**2a**)

A solution of **6** (200 mg, 0.420 mmol) and phenylisocyanate (120 mg, 1.00 mmol) of in 20.0 ml of  $\text{CHCl}_3$  was stirred at room temperature for 12 hours under  $\text{N}_2$  protection. The reaction mixture was added with 10.0 ml of 1 M  $\text{HCl}$  and the organic layer was washed with 10.0 ml of brine twice and followed by 10.0 ml of deionized water twice. After dried over  $\text{Na}_2\text{SO}_4$ , the solvent was evaporated to afford the crude product which was purified by recrystallization from acetone to give **2a** as a white solide (227 mg, 91.0 %).  $^1\text{H}$  NMR (500 MHz,  $\text{CD}_3\text{CN}$ , room temperature)  $\delta$  7.54 (1 H, s), 7.40 (2 H, d,  $J$  = 7.5 Hz), 7.23 (2 H, t,  $J$  = 7.5 Hz), 6.85–6.96 (8 H, m), 5.82 (1 H, s), 4.27 (2 H, d,  $J$  = 6.0 Hz), 4.09–4.13 (8 H, m), 3.75–3.78 (8 H, m), 3.65 (8 H, m).  $^{13}\text{C}$  NMR (100 MHz,  $\text{CDCl}_3$ , 22 °C)  $\delta$  155.9, 148.9, 148.8, 148.7, 147.8, 139.2, 132.6, 128.9, 122.7, 121.5, 121.5, 120.4, 119.6, 114.1, 114.1, 114.0, 113.3, 71.2, 71.1, 71.1, 69.9, 69.9, 69.8, 69.5, 69.2, 69.2, 69.1, 43.7. Low-resolution ESI-MS:  $m/z$  597.2 (19%) [**2a** +  $\text{H}$ ] $^+$ , 614.3 (19%) [**2a** +  $\text{NH}_4$ ] $^+$ , 619.3 (100%) [**2a** +  $\text{Na}$ ] $^+$  and 635.2 (28%) [**2a** +  $\text{K}$ ] $^+$ . Anal. Calcd. for  $\text{C}_{32}\text{H}_{40}\text{N}_2\text{O}_9$ : C, 64.41; H, 6.76; N, 4.69; Found: C, 64.43; H, 6.77; N, 4.69.

#### 5. Synthesis of compound **2b**

Compound **2b** was prepared according to the procedure for **2a** in 92% yield as a white solid.  $^1\text{H}$  NMR (400 MHz,  $\text{CD}_3\text{CN}$ , room temperature)  $\delta$  8.36 (1 H, s), 8.10 (2 H, d,  $J$  = 8.8 Hz), 7.62 (2 H, d,  $J$  = 8.8 Hz), 6.85–6.96 (7 H, m), 6.12 (1 H, s), 4.29 (2 H, d,  $J$  = 6.0 Hz), 4.10 (8 H, m), 3.77 (8 H, m), 3.66 (8 H, m).  $^{13}\text{C}$  NMR (100 MHz,  $\text{CDCl}_3$ , 22 °C)  $\delta$  155.0, 148.4, 148.4, 148.2, 146.0, 141.2, 124.8, 117.0, 69.1, 68.8, 68.7, 68.6, 43.4. Low-resolution ESI-MS:  $m/z$  659.3 (28%) [**2b** +  $\text{NH}_4$ ] $^+$ , 664.3 (100%) [**2b** +  $\text{Na}$ ] $^+$  and 680.2 (27%) [**2b** +  $\text{K}$ ] $^+$ . Anal. Calcd. for  $\text{C}_{32}\text{H}_{39}\text{N}_3\text{O}_{11}$ : C, 59.90; H, 6.13; N, 6.55; Found: C, 59.89; H, 6.10; N, 6.56.

## 6. Synthesis of compound **2c**

Compound **2c** was prepared according to the procedure for **2a** in 90% yield as a white solid.  $^1\text{H}$  NMR (400 MHz,  $\text{CD}_3\text{CN}$ , room temperature) 7.53–7.60 (5 H, m), 6.83–5.93 (7 H, m), 5.67 (1 H, s), 4.28 (2H, d,  $J = 6.0$  Hz), 4.08 (8 H, m), 3.79 (8 H, m), 3.64–3.67 (8 H, m).  $^{13}\text{C}$  NMR (100 MHz,  $\text{CDCl}_3$ , 22 °C):  $\delta$  155.4, 148.7, 148.6, 148.5, 147.7, 142.7, 132.1, 125.9, 121.5, 121.4, 120.4, 117.7, 113.8, 113.7, 112.9, 71.2, 71.0, 69.9, 69.4, 69.0, 68.9, 68.7, 43.7. High-resolution ESI-MS:  $m/z$  calcd for  $[\mathbf{2c} + \text{Na}]^+$   $\text{C}_{33}\text{H}_{39}\text{N}_2\text{O}_9\text{F}_3\text{Na}$ , 687.2505, found 687.2455, error  $-7.3$  ppm and calcd for  $[\mathbf{2c} + \text{K}]^+$   $\text{C}_{33}\text{H}_{39}\text{N}_2\text{O}_9\text{F}_3\text{K}$  703.2245, found 703.2213, error  $-4.6$  ppm.

## 7. $^1\text{H}$ and $^{13}\text{C}$ NMR spectra of **5**, **6**, **2a**, **2b** and **2c**

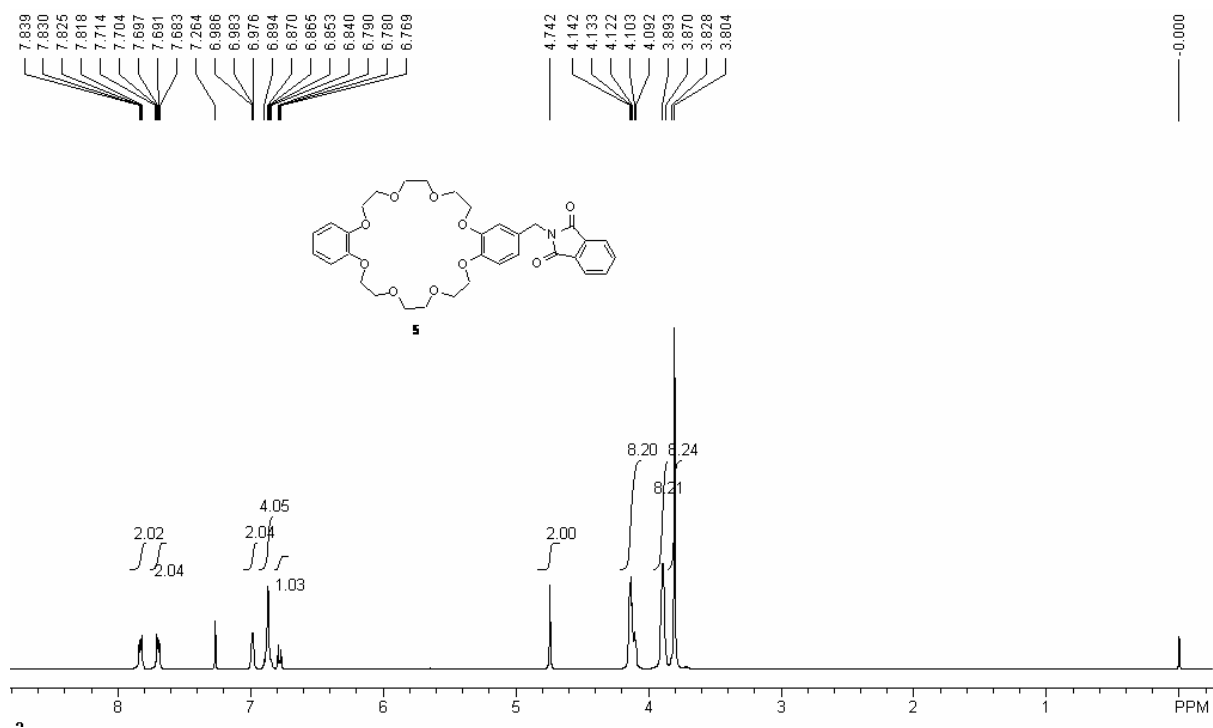

**Fig. S1.**  $^1\text{H}$  NMR spectrum of **5** (400 MHz,  $\text{CDCl}_3$ , 22 °C).

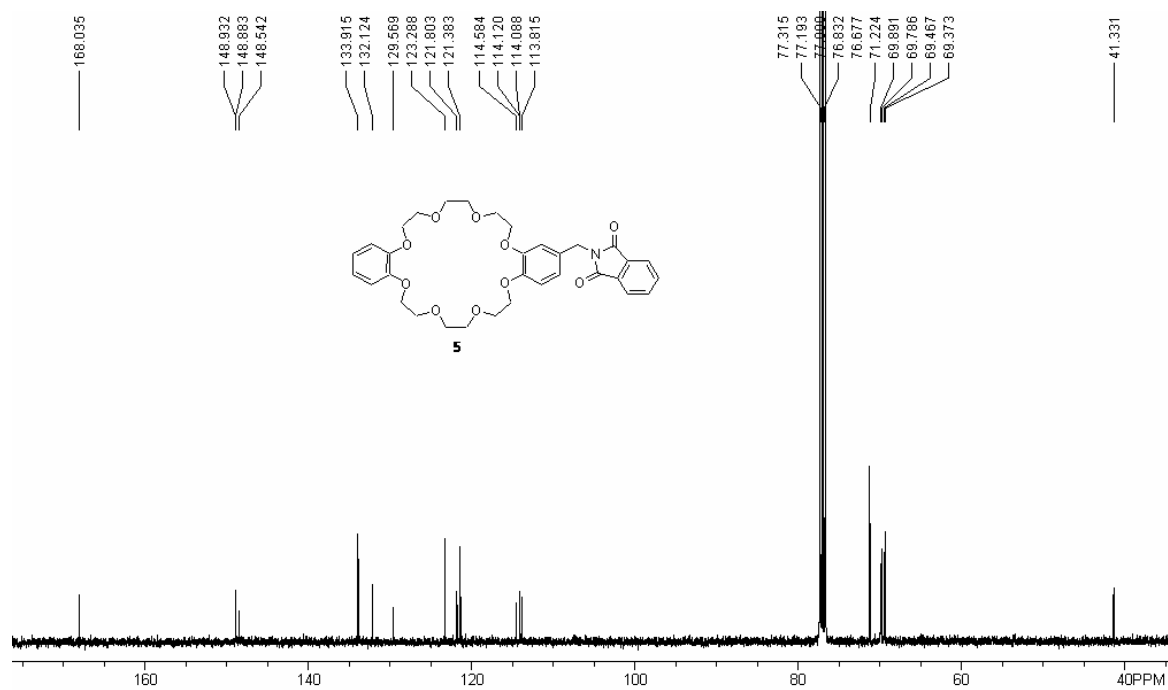

**Fig. S2.** <sup>13</sup>C NMR spectrum of **5** (100 MHz, CDCl<sub>3</sub>, 22 °C).

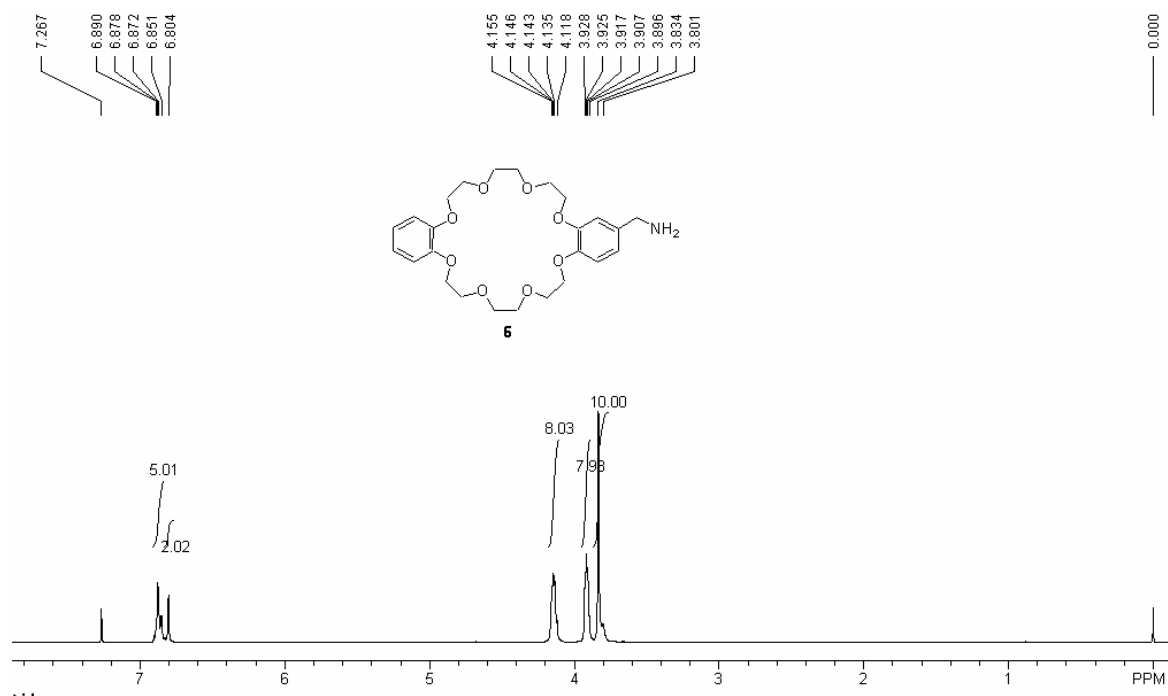

**Fig. S3.** <sup>1</sup>H NMR spectrum of **6** (400 MHz, CDCl<sub>3</sub>, 22 °C).

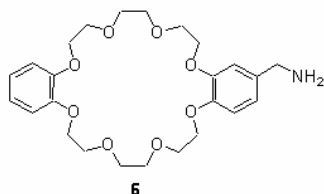

**Fig. S4.**  $^{13}\text{C}$  NMR spectrum of **6** (100 MHz,  $\text{CDCl}_3$ , 22  $^\circ\text{C}$ ).

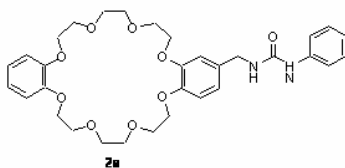

**Fig. S5.**  $^1\text{H}$  NMR spectrum of **2a** (400 MHz,  $\text{CD}_3\text{CN}$ , 22  $^\circ\text{C}$ ).

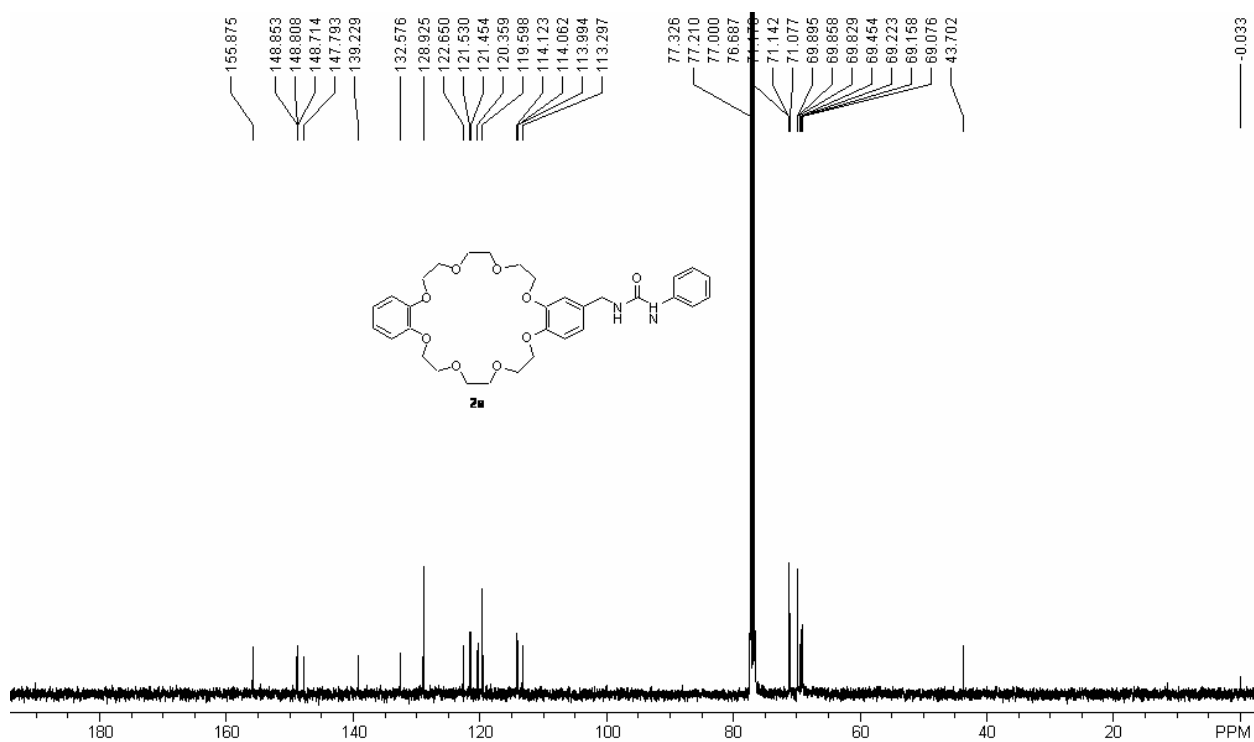

**Fig. S6.**  $^{13}\text{C}$  NMR spectrum of **2a** (100 MHz,  $\text{CDCl}_3$ , 22 °C).

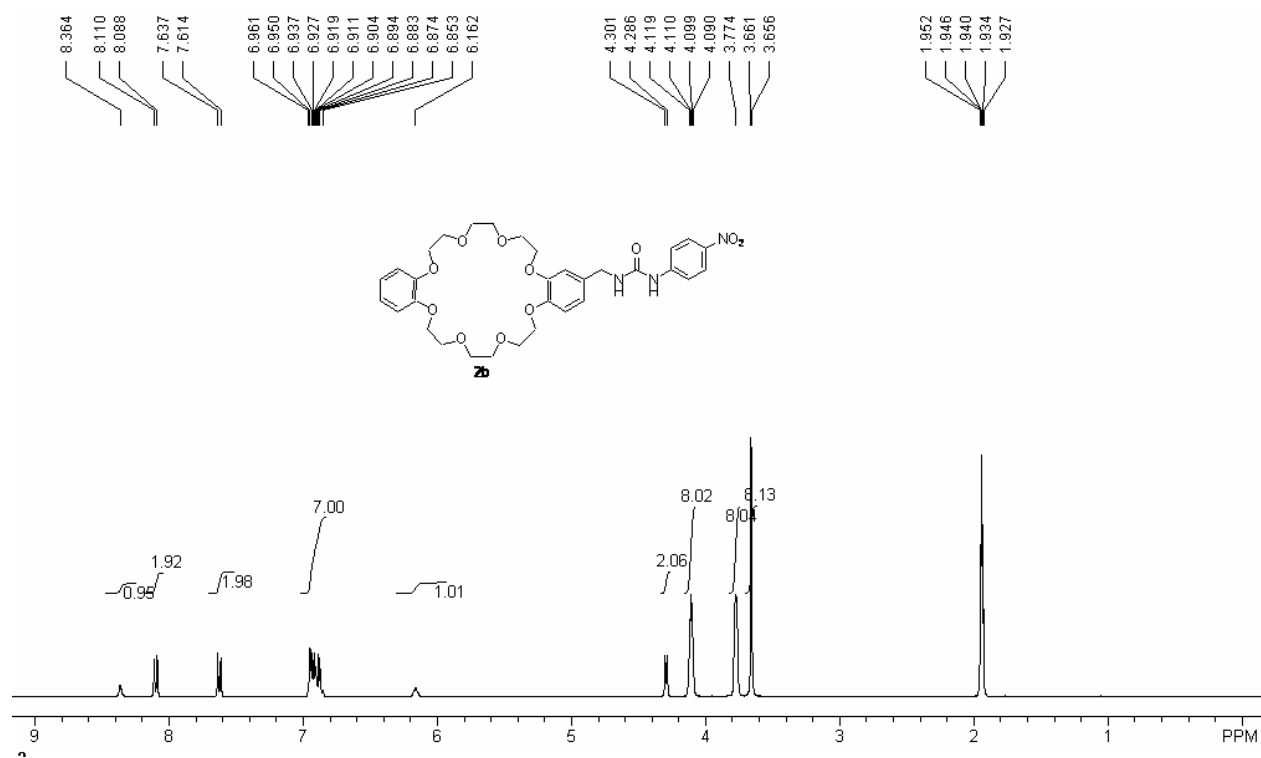

**Fig. S7.**  $^1\text{H}$  NMR spectrum of **2b** (400 MHz,  $\text{CD}_3\text{CN}$ , 22 °C).

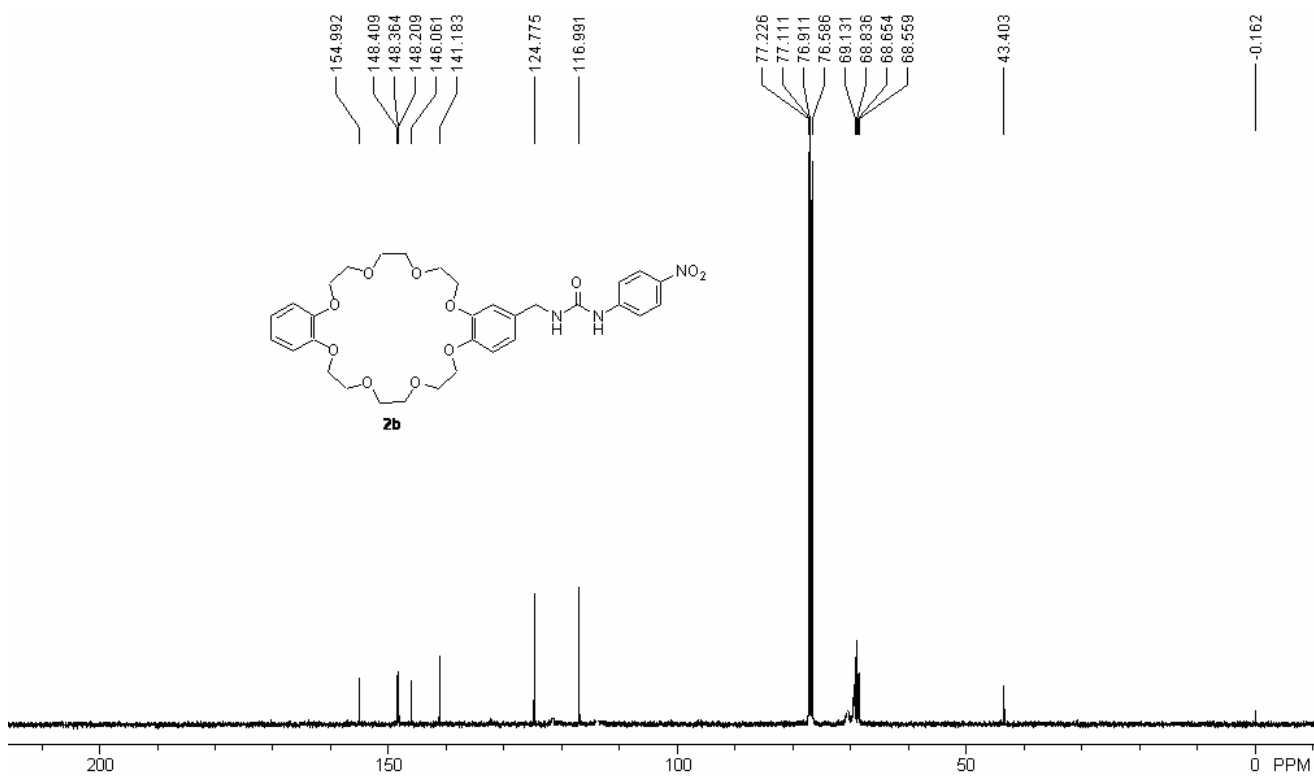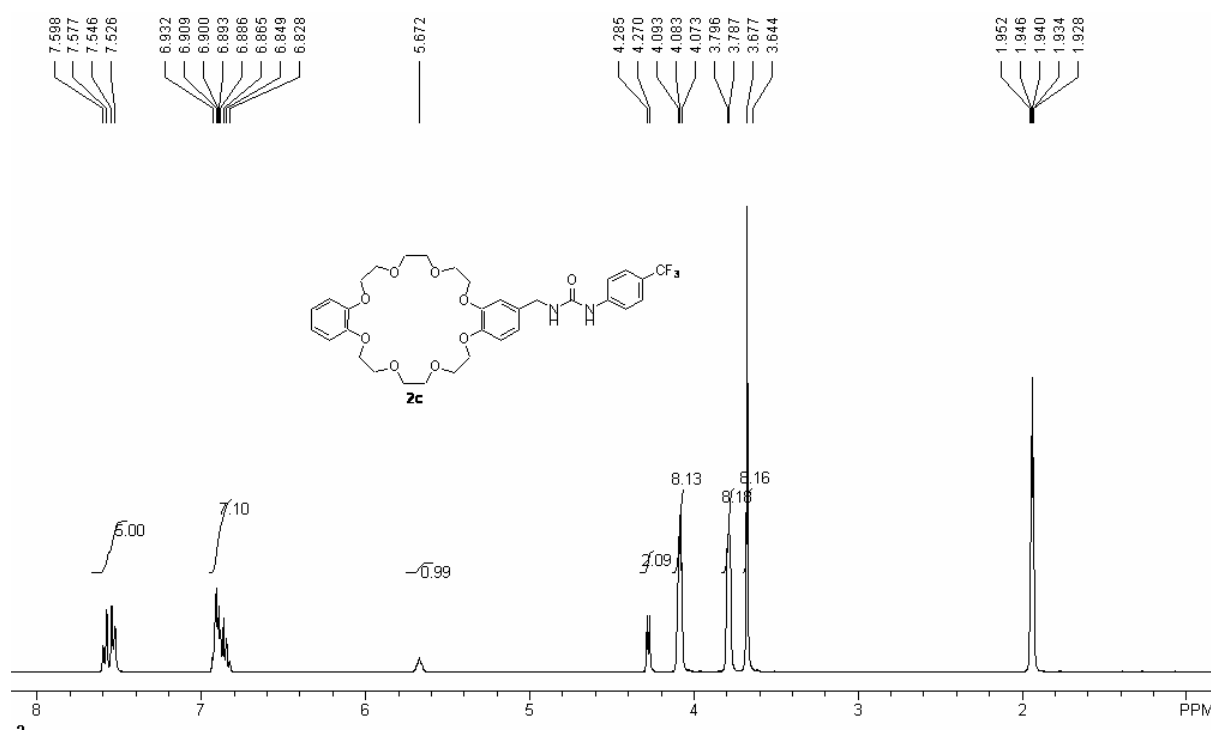



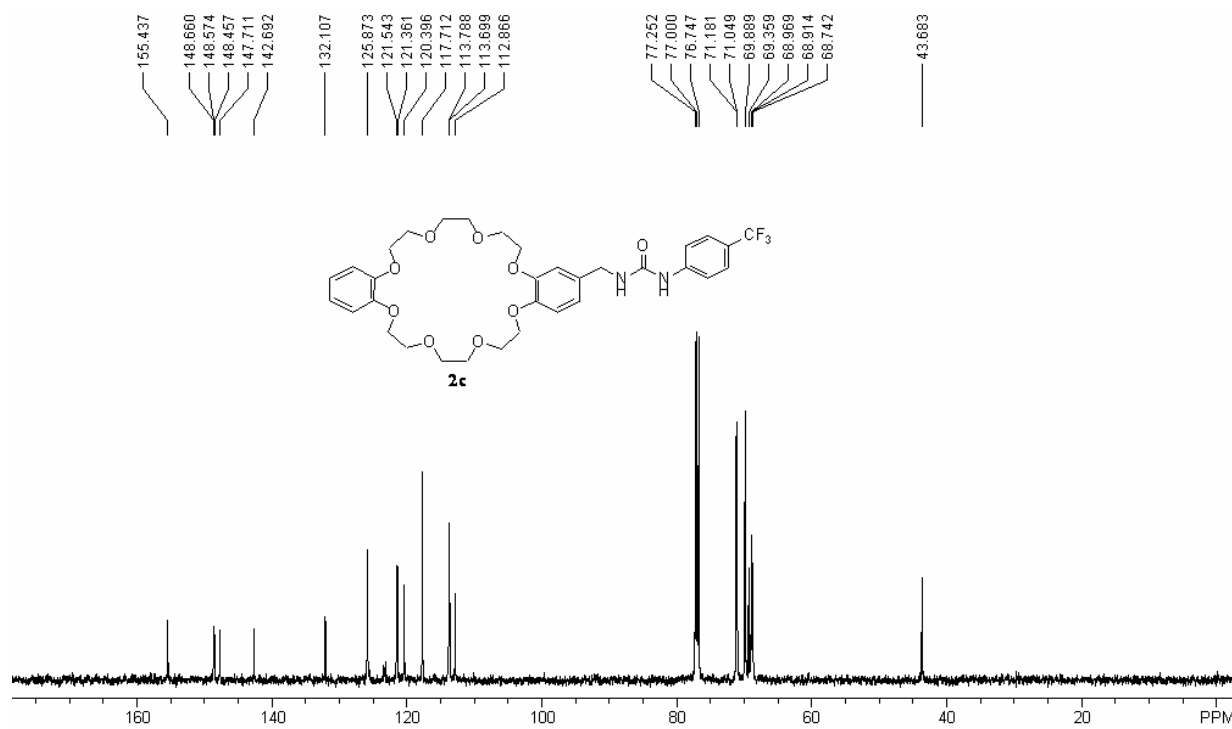

**Fig. S10.**  $^{13}\text{C}$  NMR spectrum of **2c** (100 MHz,  $\text{CDCl}_3$ , 22 °C).

8. Determination of association constants of **1•3a**, **1•3b**, **1•3c**, **2a•3a**, **2a•3b**, **2a•3c**, **2b•3a**, **2b•3b**, **2b•3c**, **2c•3a**, **2c•3b** and **2c•3c** from integrations of complexed and uncomplexed peaks in 1:1 host and guest solutions

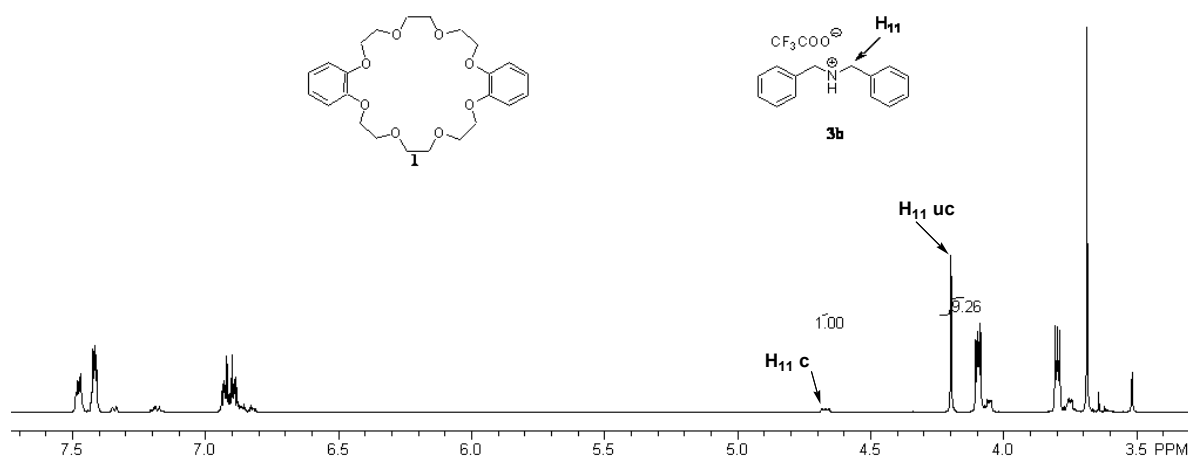

**Fig. S11.**  $^1\text{H}$  NMR spectrum (500 MHz,  $\text{CD}_3\text{CN}$ , 22  $^\circ\text{C}$ ) of 2.00 mM **1** and **3b**. The association constant  $K_{a,1\bullet 3b}$  value calculated from integrations of complexed and uncomplexed peaks of  $\text{H}_{11}$  of **3b** is  $[(1.00/10.26) \times 1.00 \times 10^{-3}] / [(1 - 1.00/10.26) \times 1.00 \times 10^{-3}]^2 = 59 \text{ M}^{-1}$ .

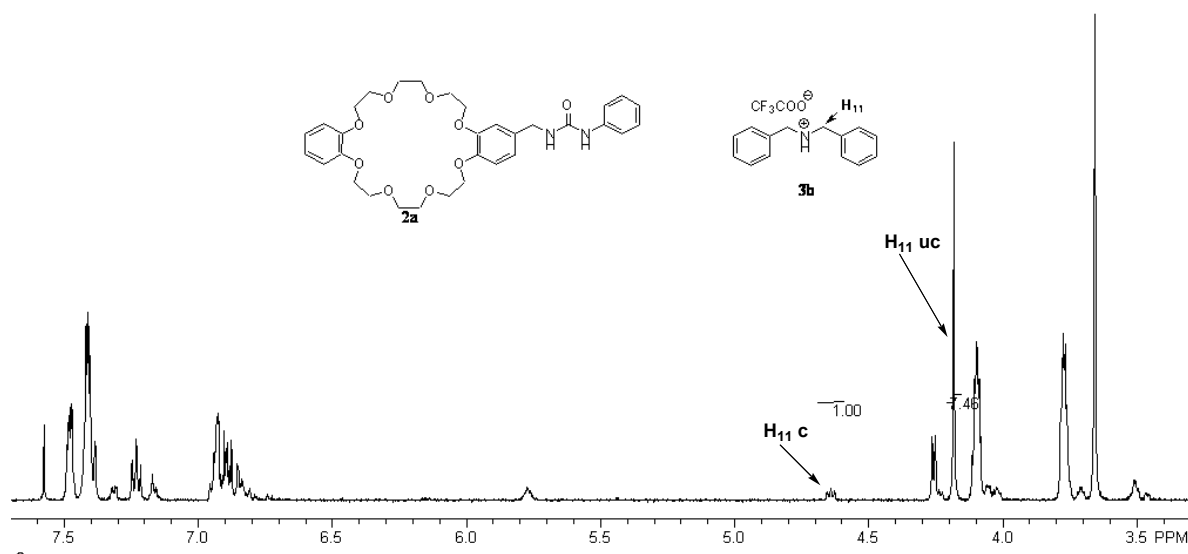

**Fig. S12.**  $^1\text{H}$  NMR spectrum (500 MHz,  $\text{CD}_3\text{CN}$ , 22  $^\circ\text{C}$ ) of 2.00 mM **2a** and **3b**. The association constant  $K_{a,2a\bullet 3b}$  value calculated from integrations of complexed and uncomplexed peaks of  $\text{H}_{11}$  of **3b** is  $[(1.00/8.46) \times 1.00 \times 10^{-3}] / [(1 - 1.00/8.46) \times 1.00 \times 10^{-3}]^2 = 78 \text{ M}^{-1}$ .

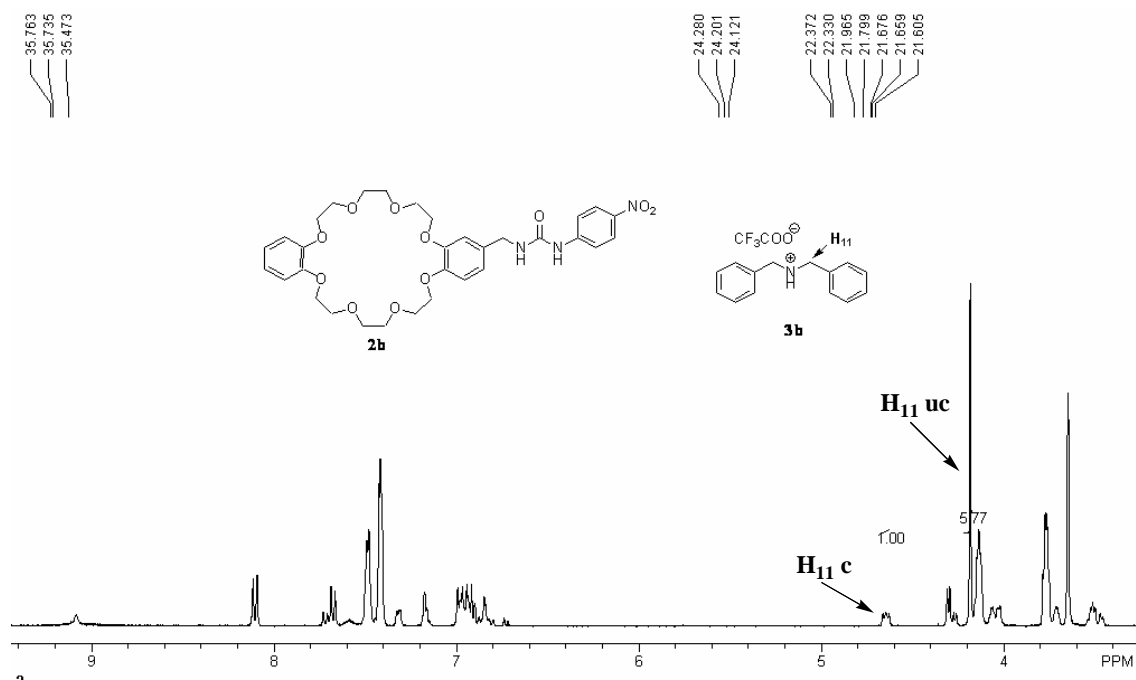

**Fig. S13.**  $^1\text{H}$  NMR spectrum (500 MHz,  $\text{CD}_3\text{CN}$ , 22 °C) of 2.00 mM **2b** and **3b**. The association constant  $K_{a,2b\cdot 3b}$  value calculated from integrations of complexed and uncomplexed peaks of  $\text{H}_{11}$  of **3b** is  $[(1.00/6.77) \times 2.00 \times 10^{-3}] / [(1 - 1.00/6.77) \times 2.00 \times 10^{-3}]^2 = 102 \text{ M}^{-1}$ .

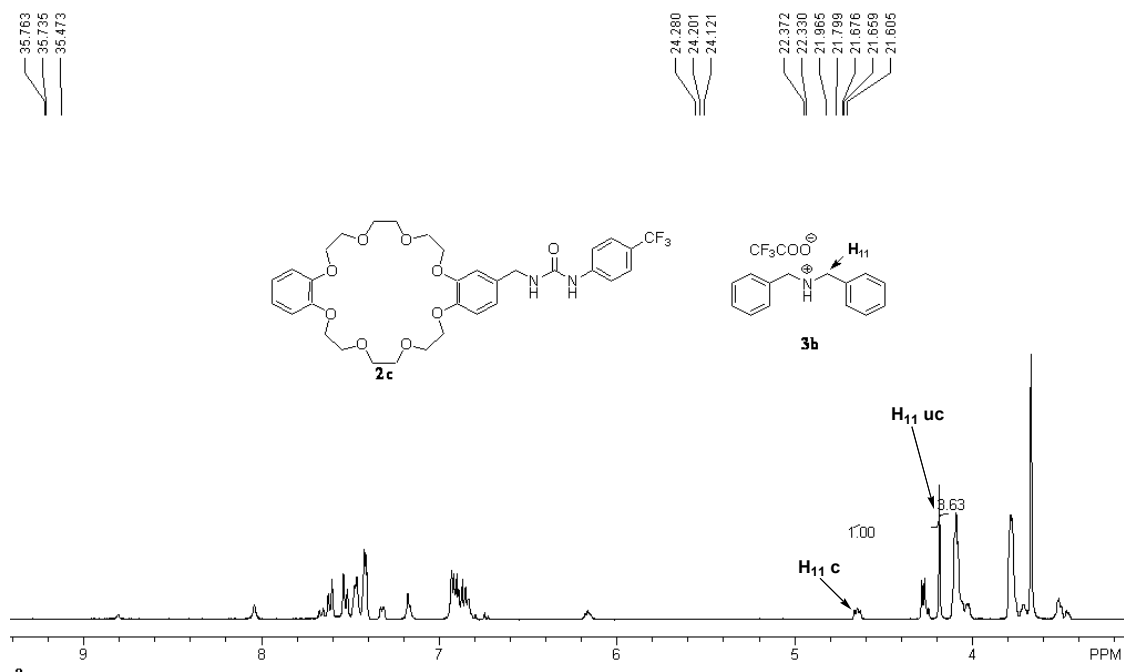

**Fig. S14.**  $^1\text{H}$  NMR spectrum (500 MHz,  $\text{CD}_3\text{CN}$ , 22 °C) of 2.00 mM **2c** and **3b**. The association constant  $K_{a,2c\cdot 3b}$  value calculated from integrations of complexed and uncomplexed peaks of  $\text{H}_{11}$  of **3b** is  $[(1.00/4.63) \times 2.00 \times 10^{-3}] / [(1 - 1.00/4.63) \times 2.00 \times 10^{-3}]^2 = 176 \text{ M}^{-1}$ .

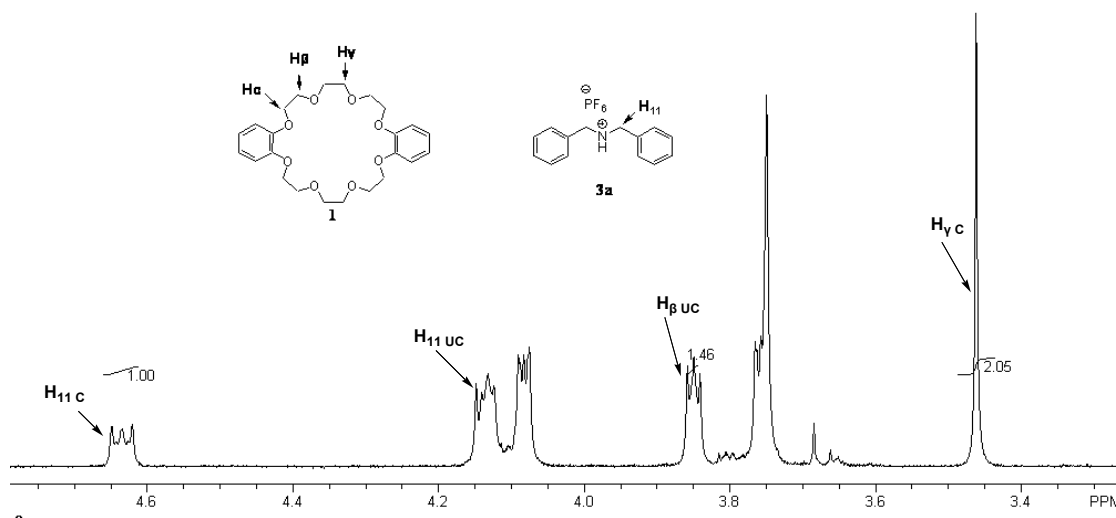

**Fig. S15.**  $^1\text{H}$  NMR spectrum (500 MHz, 3:2  $\text{CDCl}_3:\text{CD}_3\text{CN}$ , 22 °C) of 2.00 mM **1** and **3a**. The association constant  $K_{a,1\cdot 3a}$  value calculated from integrations of complexed peaks of  $\text{H}_\gamma$  of **1** and uncomplexed peaks of  $\text{H}_\beta$  of **1** is  $[(2.05/3.51) \times 2.00 \times 10^{-3}] / [(1 - 2.05/3.51) \times 2.00 \times 10^{-3}]^2 = 1687 \text{ M}^{-1}$ .

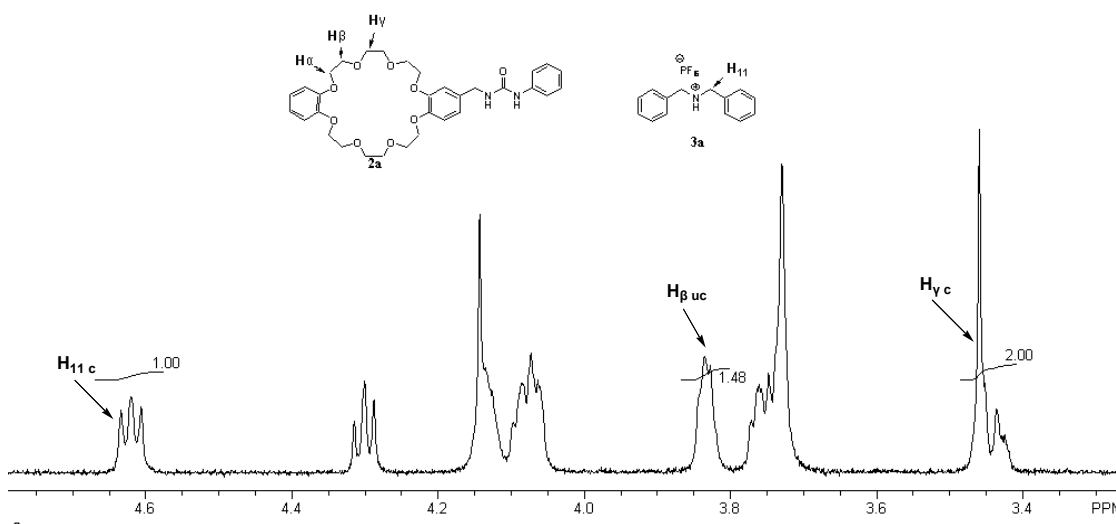

**Fig. S16.**  $^1\text{H}$  NMR spectrum (500 MHz, 3:2  $\text{CDCl}_3:\text{CD}_3\text{CN}$ , 22 °C) of 2.00 mM **2a** and **3a**. The association constant  $K_{a,2a\cdot 3a}$  value calculated from integrations of complexed peaks of  $\text{H}_\gamma$  of **2a** and uncomplexed peaks of  $\text{H}_\beta$  of **2a** is  $[(2.00/3.48) \times 2.00 \times 10^{-3}] / [(1 - 2.00/3.48) \times 2.00 \times 10^{-3}]^2 = 1589 \text{ M}^{-1}$ .

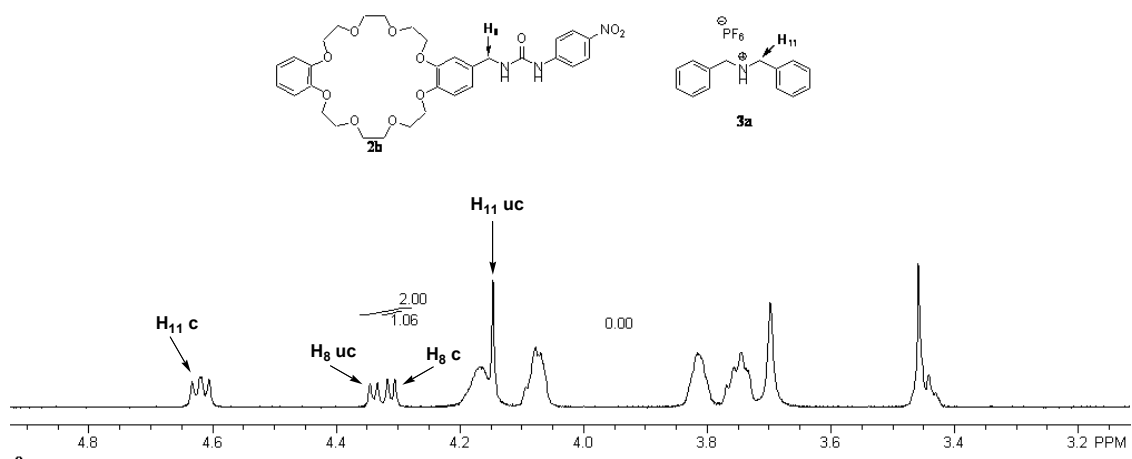

**Fig. S17.**  $^1\text{H}$  NMR spectrum (500 MHz, 3:2  $\text{CDCl}_3:\text{CD}_3\text{CN}$ , 22 °C) of 2.00 mM **2b** and **3a**. The association constant  $K_{\text{a},2\text{b}\cdot3\text{a}}$  value calculated from integrations of complexed and uncomplexed peaks of  $\text{H}_8$  of **2b** is  $[(1.060/2.00) \times 2.00 \times 10^{-3}] / [(1 - 1.060/2.00) \times 2.00 \times 10^{-3}]^2 = 1200 \text{ M}^{-1}$ .

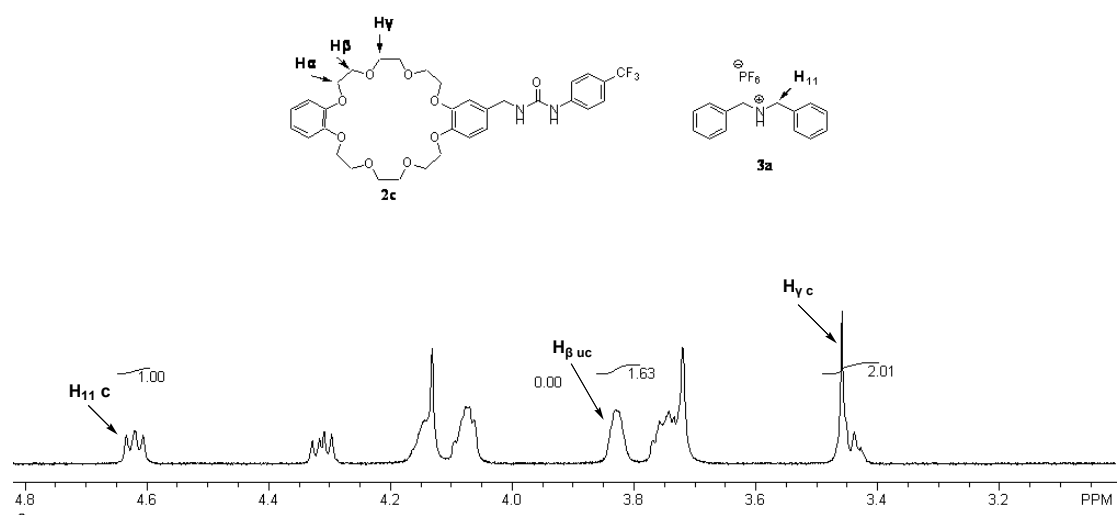

**Fig. S18.**  $^1\text{H}$  NMR spectrum (500 MHz, 3:2  $\text{CDCl}_3:\text{CD}_3\text{CN}$ , 22 °C) of 2.00 mM **2c** and **3a**. The association constant  $K_{\text{a},2\text{c}\cdot3\text{a}}$  value calculated from integrations of complexed peaks of  $\text{H}_8$  of **2c** and uncomplexed peaks of  $\text{H}_8$  of **2c** is  $[(2.01/3.64) \times 2.00 \times 10^{-3}] / [(1 - 2.01/3.64) \times 2.00 \times 10^{-3}]^2 = 1377 \text{ M}^{-1}$ .

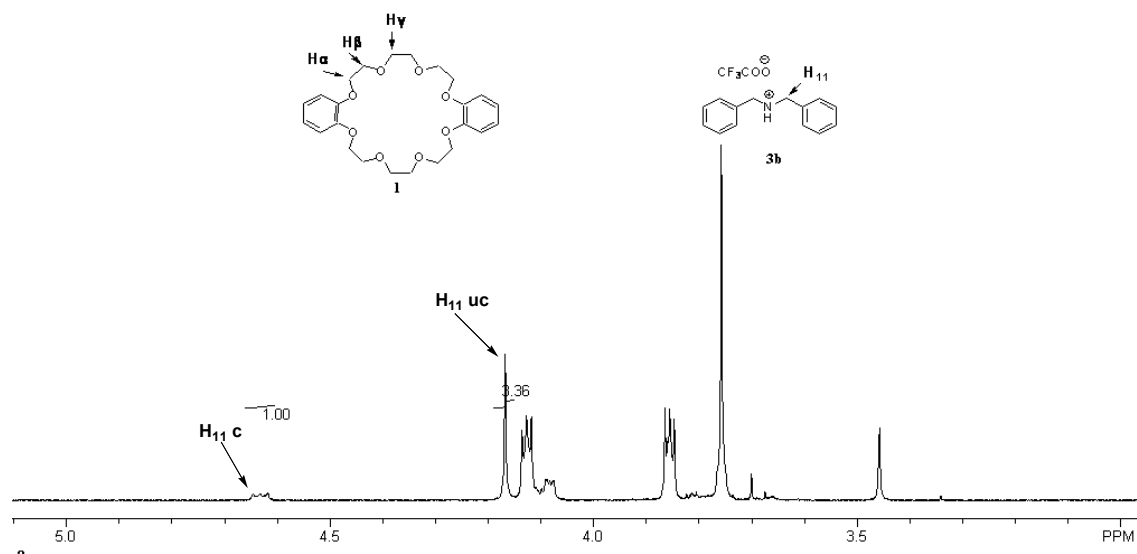

**Fig. S19.** <sup>1</sup>H NMR spectrum (500 MHz, 3:2 CDCl<sub>3</sub>:CD<sub>3</sub>CN, 22 °C) of 2.00 mM **1** and **3b**. The association constant  $K_{a,2a\bullet 3b}$  value calculated from integrations of complexed and uncomplexed peaks of H<sub>11</sub> of **3b** is  $[(1.00/4.36) \times 2.00 \times 10^{-3}] / [(1 - 1.00/4.36) \times 2.00 \times 10^{-3}]^2 = 193 \text{ M}^{-1}$ .

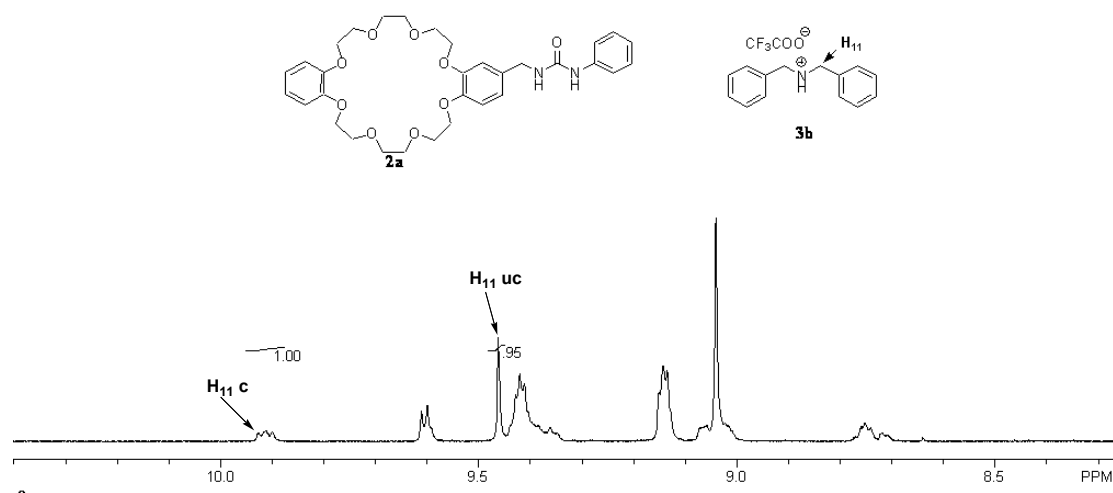

**Fig. S20.** <sup>1</sup>H NMR spectrum (500 MHz, 3:2 CDCl<sub>3</sub>:CD<sub>3</sub>CN, 22 °C) of 2.00 mM **2a** and **3b**. The association constant  $K_{a,2a\bullet 3b}$  value calculated from integrations of complexed and uncomplexed peaks of H<sub>11</sub> of **3b** is  $[(1.00/2.95) \times 2.00 \times 10^{-3}] / [(1 - 1.00/2.95) \times 2.00 \times 10^{-3}]^2 = 388 \text{ M}^{-1}$ .

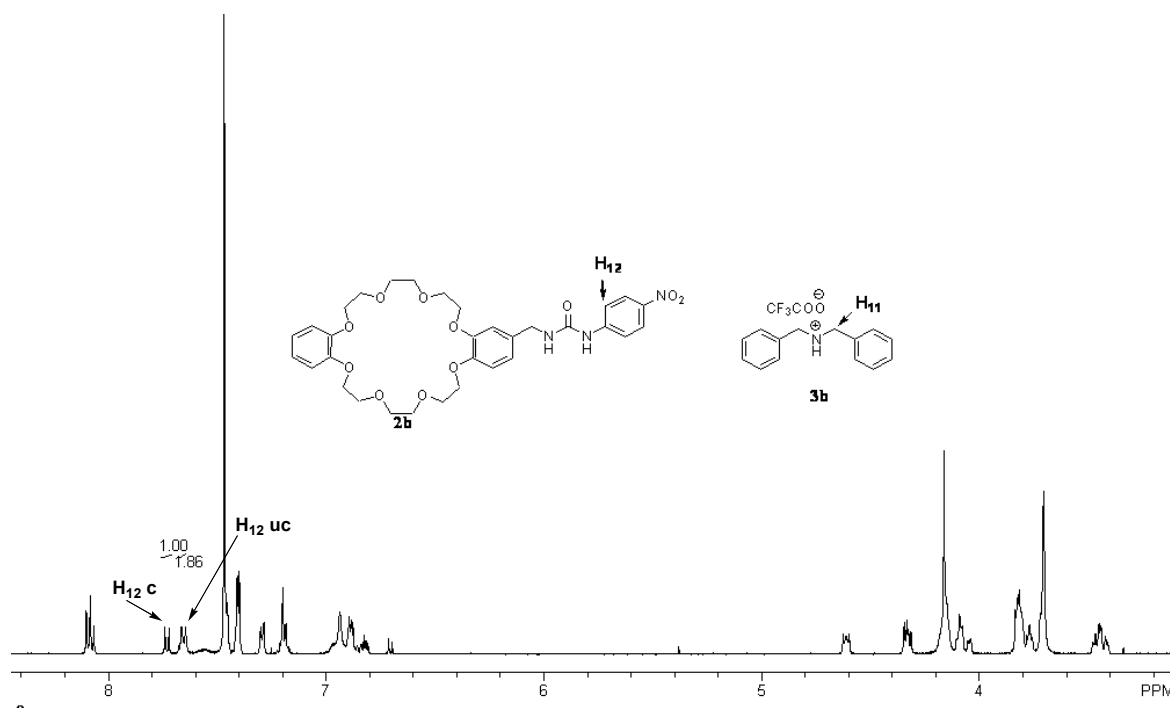

**Fig. S21.**  $^1\text{H}$  NMR spectrum (500 MHz, 3:2  $\text{CDCl}_3:\text{CD}_3\text{CN}$ , 22 °C) of 2.00 mM **2b** and **3b**. The association constant  $K_{a,2b+3b}$  value calculated from integrations of complexed and uncomplexed peaks of H<sub>12</sub> of **2b** is  $[(1.00/2.86) \times 2.00 \times 10^{-3}] / [(1 - 1.00/2.86) \times 2.00 \times 10^{-3}]^2 = 413 \text{ M}^{-1}$ .

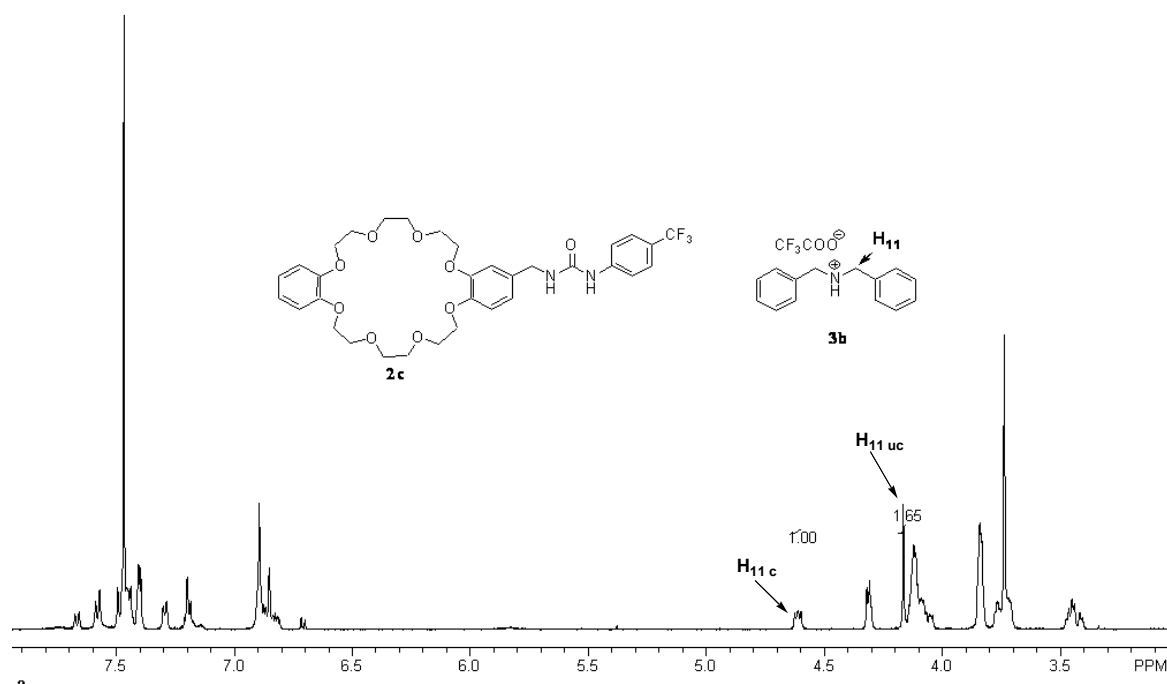

**Fig. S22.**  $^1\text{H}$  NMR spectrum (500 MHz, 3:2  $\text{CDCl}_3:\text{CD}_3\text{CN}$ , 22 °C) of 2.00 mM **2c** and **3b**. The association constant  $K_{a,2c+3b}$  value calculated from integrations of complexed and uncomplexed peaks of H<sub>11</sub> of **3b** is  $[(1.00/2.65) \times 2.00 \times 10^{-3}] / [(1 - 1.00/2.65) \times 2.00 \times 10^{-3}]^2 = 487 \text{ M}^{-1}$ .

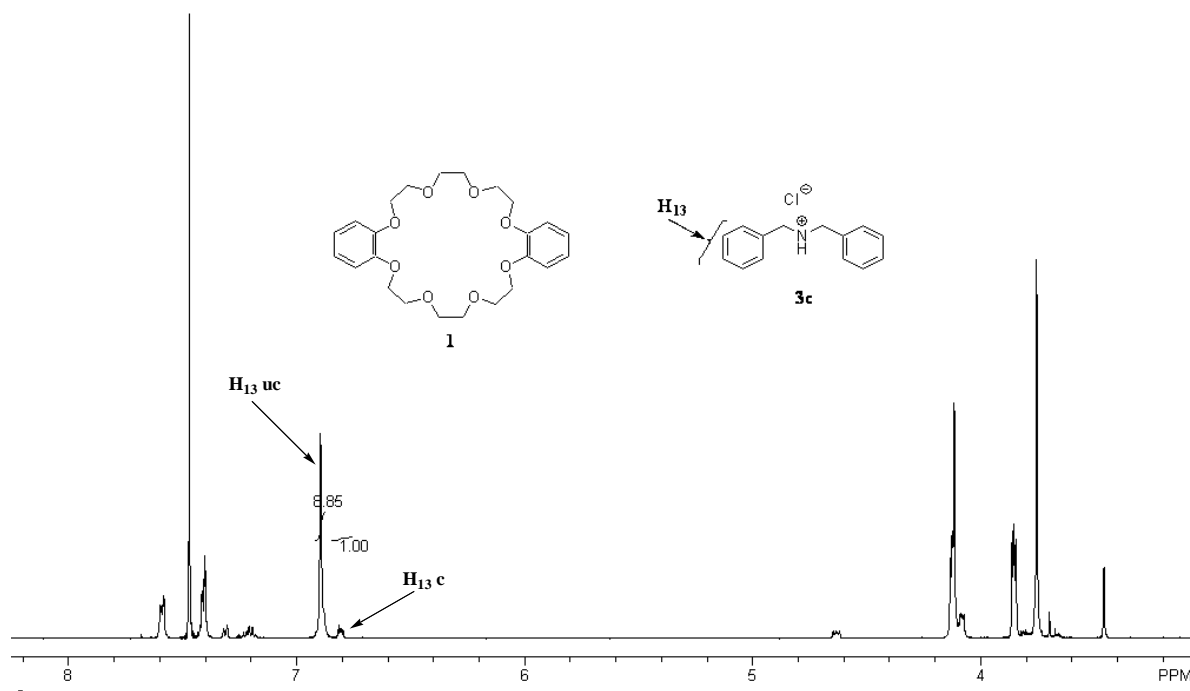

**Fig. S23.**  $^1\text{H}$  NMR spectrum (500 MHz, 3:2  $\text{CDCl}_3:\text{CD}_3\text{CN}$ , 22 °C) of 2.00 mM **1** and **3c**. The association constant  $K_{a,1\cdot 3c}$  value calculated from integrations of complexed and uncomplexed peaks of  $\text{H}_{13}$  of **3c** is  $[(1.00/9.85) \times 2.00 \times 10^{-3}] / [(1 - 1.00/9.85) \times 2.00 \times 10^{-3}]^2 = 63 \text{ M}^{-1}$ .

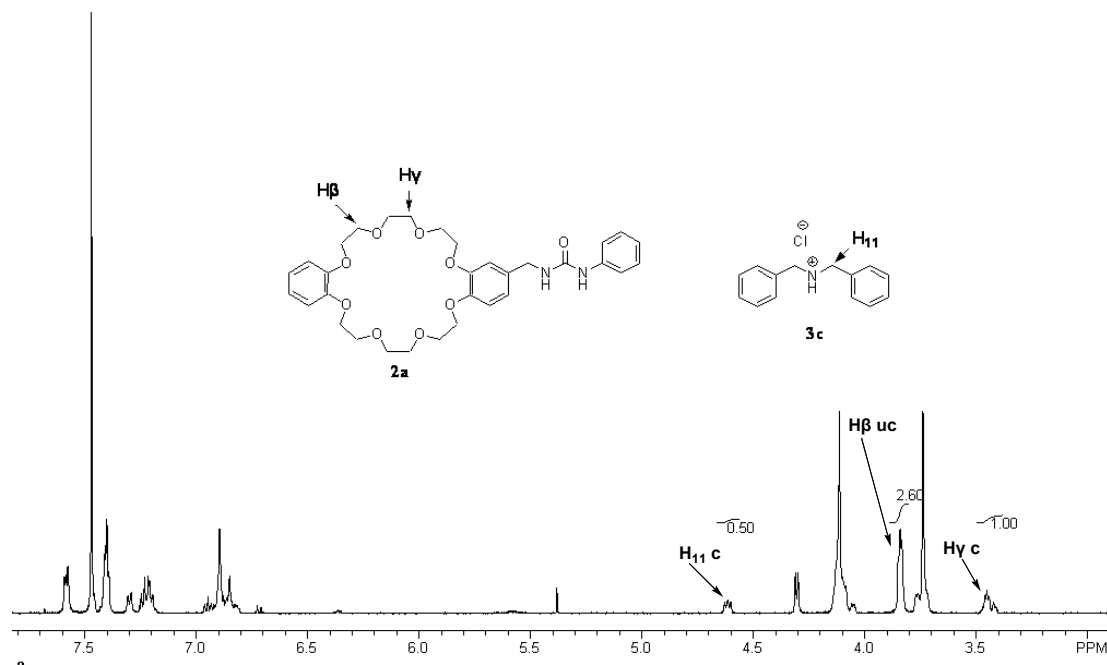

**Fig. S24.**  $^1\text{H}$  NMR spectrum (500 MHz, 3:2  $\text{CDCl}_3:\text{CD}_3\text{CN}$ , 22 °C) of 2.00 mM **2a** and **3c**. The association constant  $K_{a,2a\cdot 3c}$  value calculated from integrations of complexed peaks of  $\text{H}_\gamma$  of **2a** and uncomplexed peaks of  $\text{H}_\beta$  of **2a** is  $[(1.00/3.60) \times 2.00 \times 10^{-3}] / [(1 - 1.00/3.60) \times 2.00 \times 10^{-3}]^2 = 266 \text{ M}^{-1}$ .



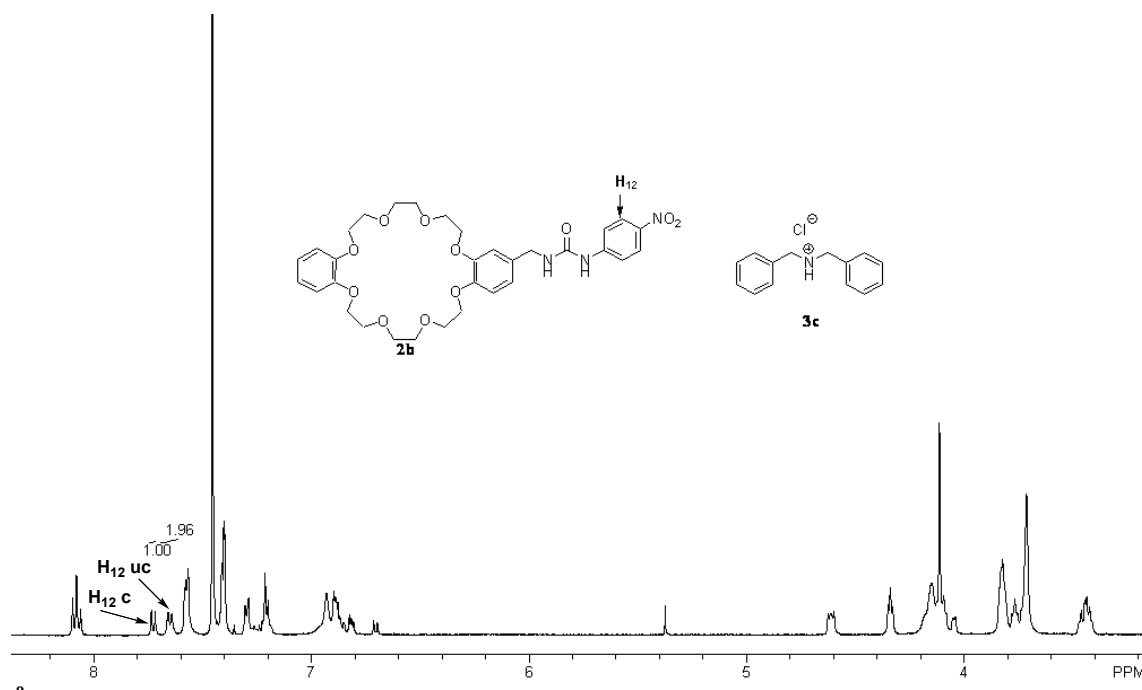

**Fig. S25.**  $^1\text{H}$  NMR spectrum (500 MHz, 3:2  $\text{CDCl}_3$ : $\text{CD}_3\text{CN}$ , 22  $^\circ\text{C}$ ) of 2.00 mM **2b** and **3c**. The association constant  $K_{a,2b\cdot 3c}$  value calculated from integrations of complexed and uncomplexed peaks of  $\text{H}_{12}$  of **2b** is  $[(1.00/2.96) \times 2.00 \times 10^{-3}] / [(1 - 1.00/2.96) \times 2.00 \times 10^{-3}]^2 = 385 \text{ M}^{-1}$ .

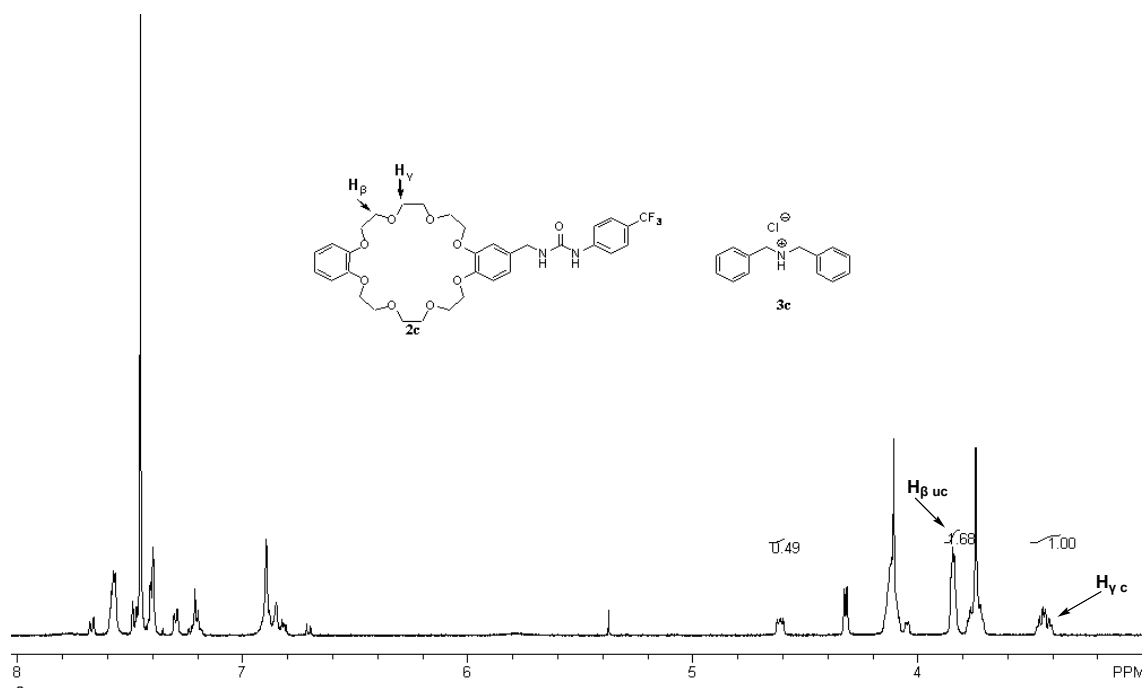

**Fig. S26.**  $^1\text{H}$  NMR spectrum (500 MHz, 3:2  $\text{CDCl}_3$ : $\text{CD}_3\text{CN}$ , 22  $^\circ\text{C}$ ) of 2.00 mM **2c** and **3c**. The association constant  $K_{a,2c\cdot 3c}$  value calculated from integrations of complexed peaks of  $\text{H}_\gamma$  of **2c** and uncomplexed peaks of  $\text{H}_\beta$  of **2c** is  $[(1.00/2.68) \times 2.00 \times 10^{-3}] / [(1 - 1.00/2.68) \times 2.00 \times 10^{-3}]^2 = 475 \text{ M}^{-1}$ .

9. ESI-MS spectra of **5**, **6**, **2a**, **2b** and **2c**

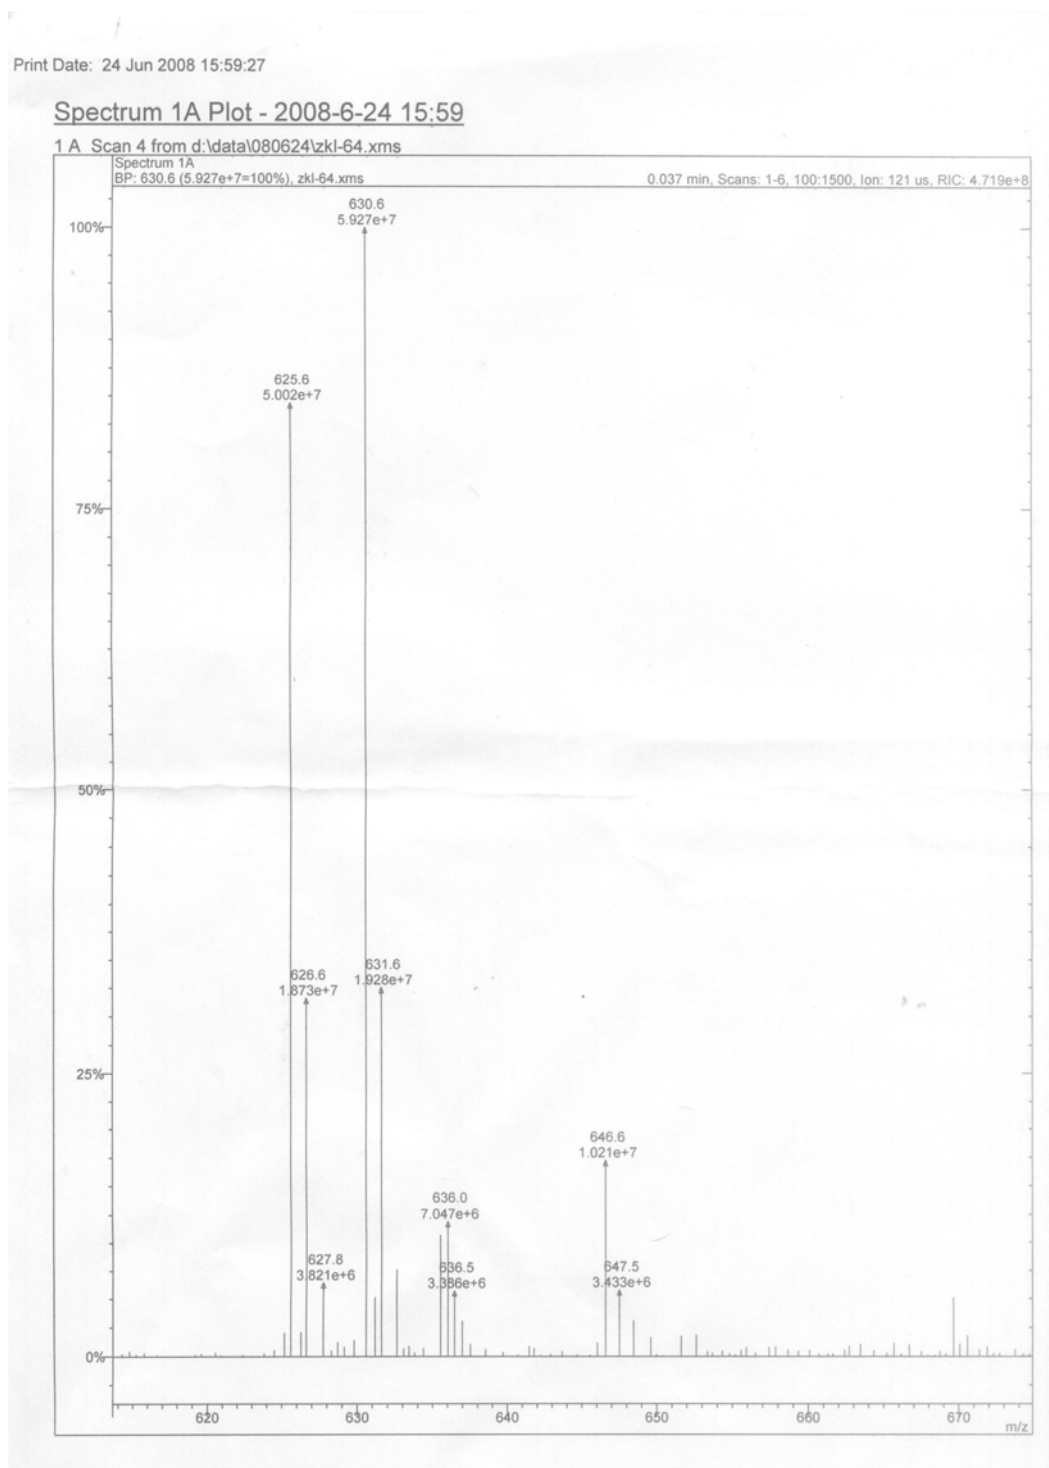

**Fig. S27.** ESI<sup>+</sup>-MS of **5** in acetonitrile/methanol. Assignment of main peaks:  $m/z$  625.6 (84%) [**5** + NH<sub>4</sub>]<sup>+</sup>, 630.6 (100%) [**5** + Na]<sup>+</sup> and 646.6 (17%) [**5** + K]<sup>+</sup>.

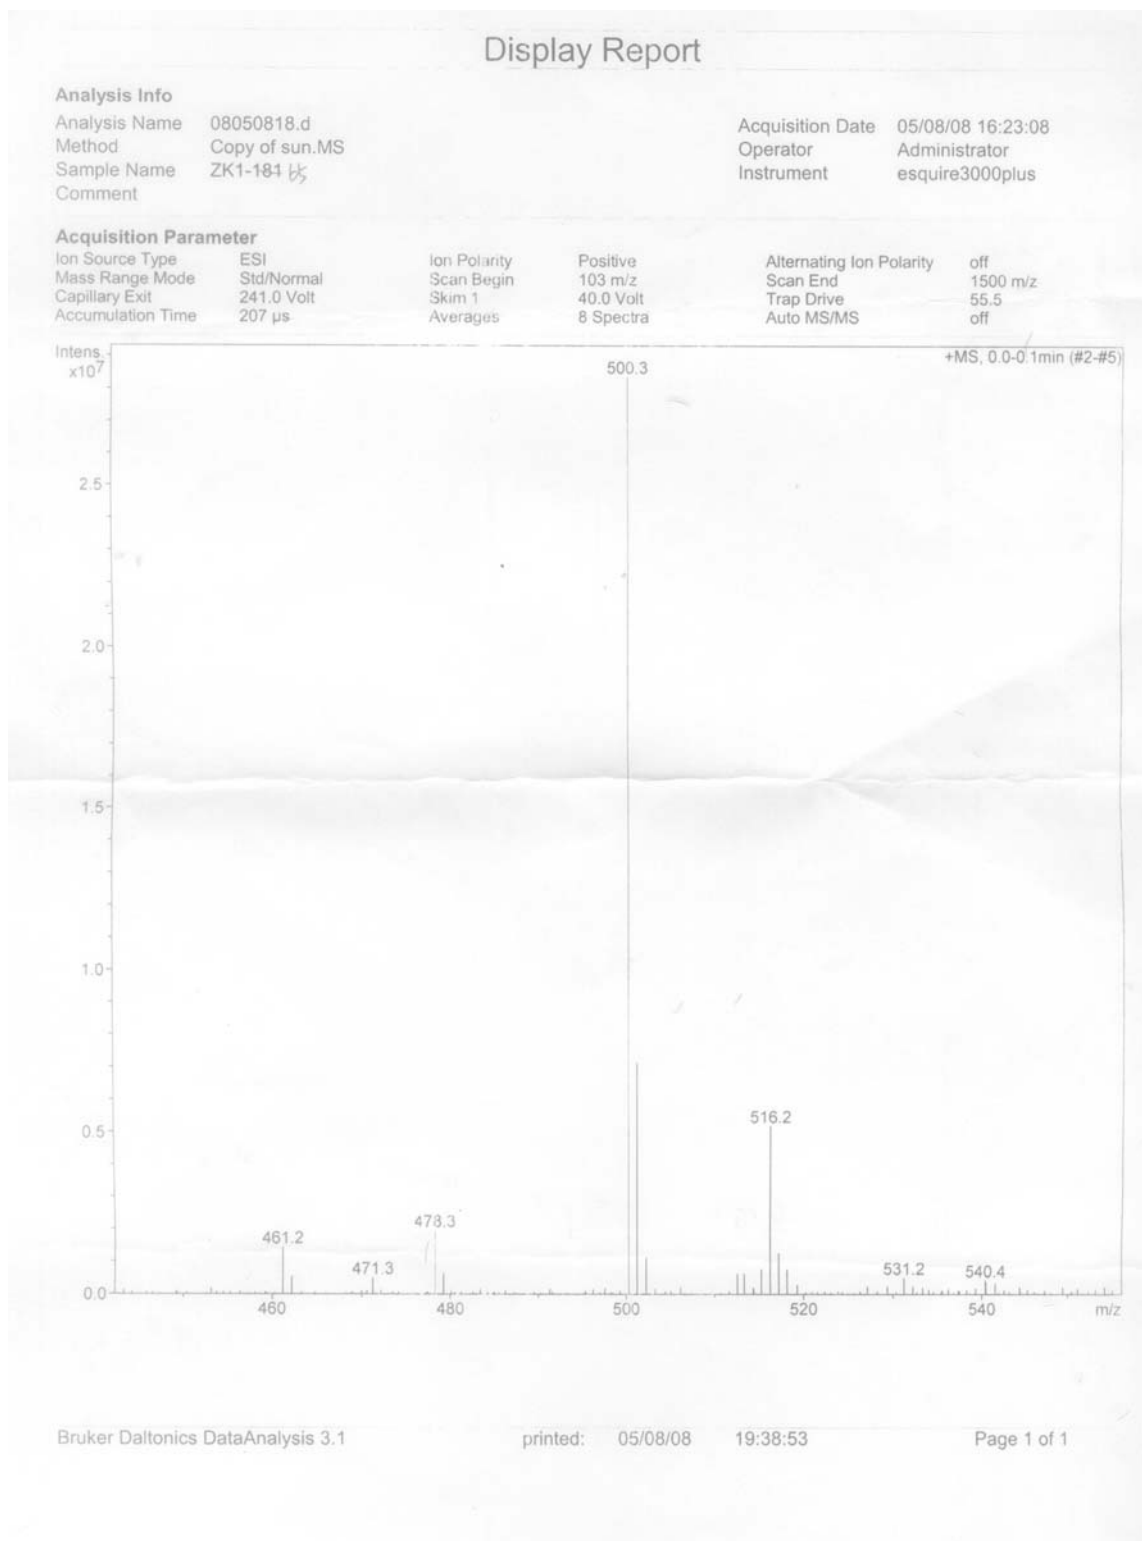

**Fig. S28.** ESI<sup>+</sup>-MS of **6** in acetonitrile/methanol. Assignment of main peaks:  $m/z$  478.3 (24%) [**6** + H]<sup>+</sup>, 500.3 (100%) [**5** + Na]<sup>+</sup> and 516.2 (17%) [**5** + K]<sup>+</sup>

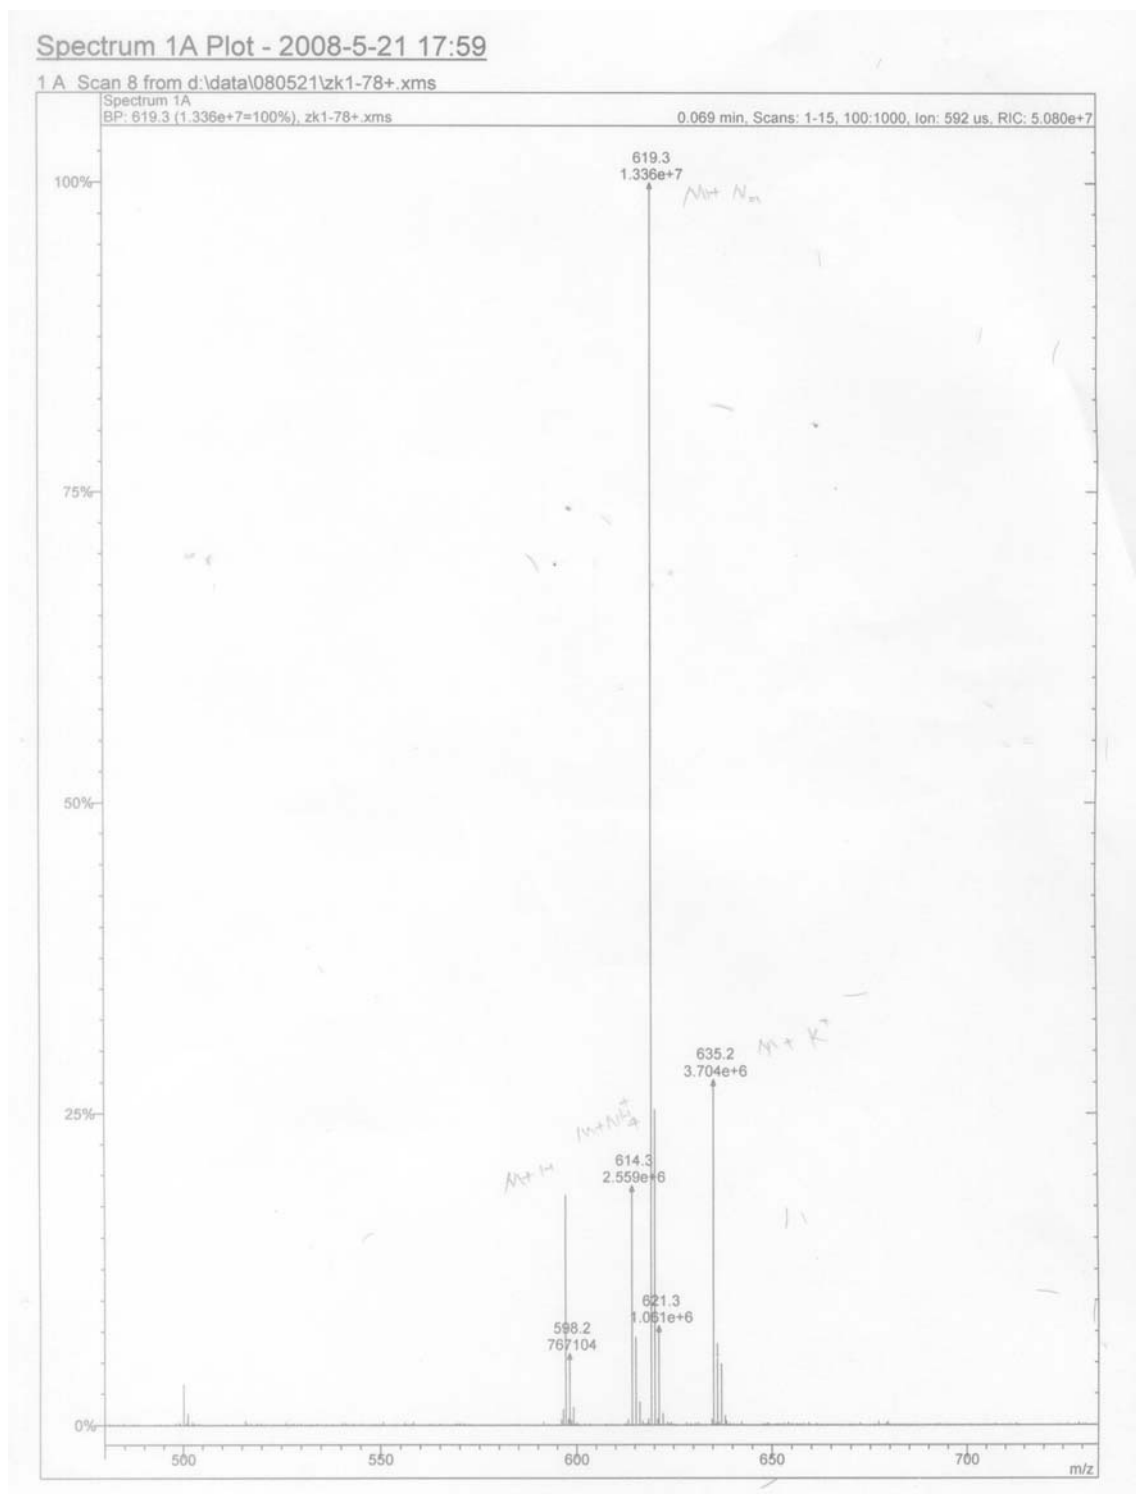

**Fig. S29.** ESI<sup>+</sup>-MS of **2a** in acetonitrile/methanol. Assignment of main peaks:  $m/z$  597.2 (19%)  $[2a + H]^+$ , 614.3 (19%)  $[2a + NH_4]^+$ , 619.3 (100%)  $[2a + Na]^+$  and 635.2 (28%)  $[2a + K]^+$ .

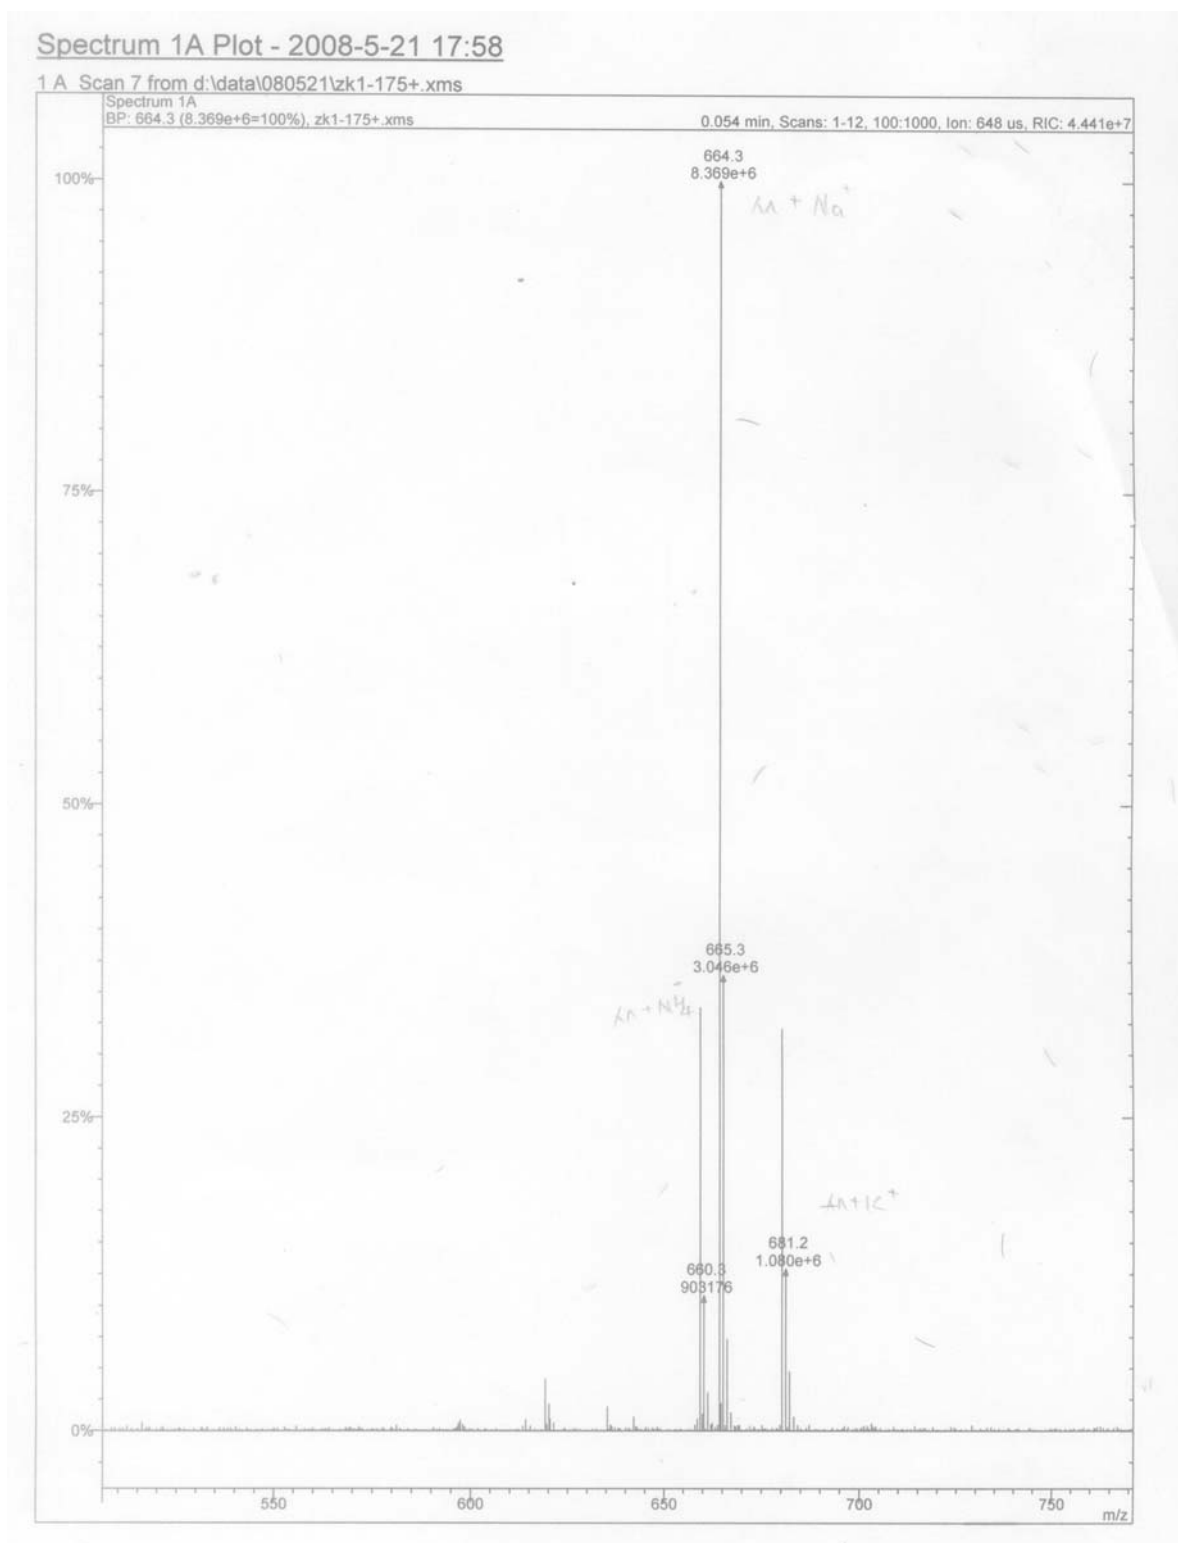

**Fig. S30.** ESI<sup>+</sup>-MS of **2b** in acetonitrile/methanol. Assignment of main peaks:  $m/z$  659.3 (28%) [**2b** + NH<sub>4</sub>]<sup>+</sup>, 664.3 (100%) [**2b** + Na]<sup>+</sup> and 680.2 (27%) [**2b** + K]<sup>+</sup>.

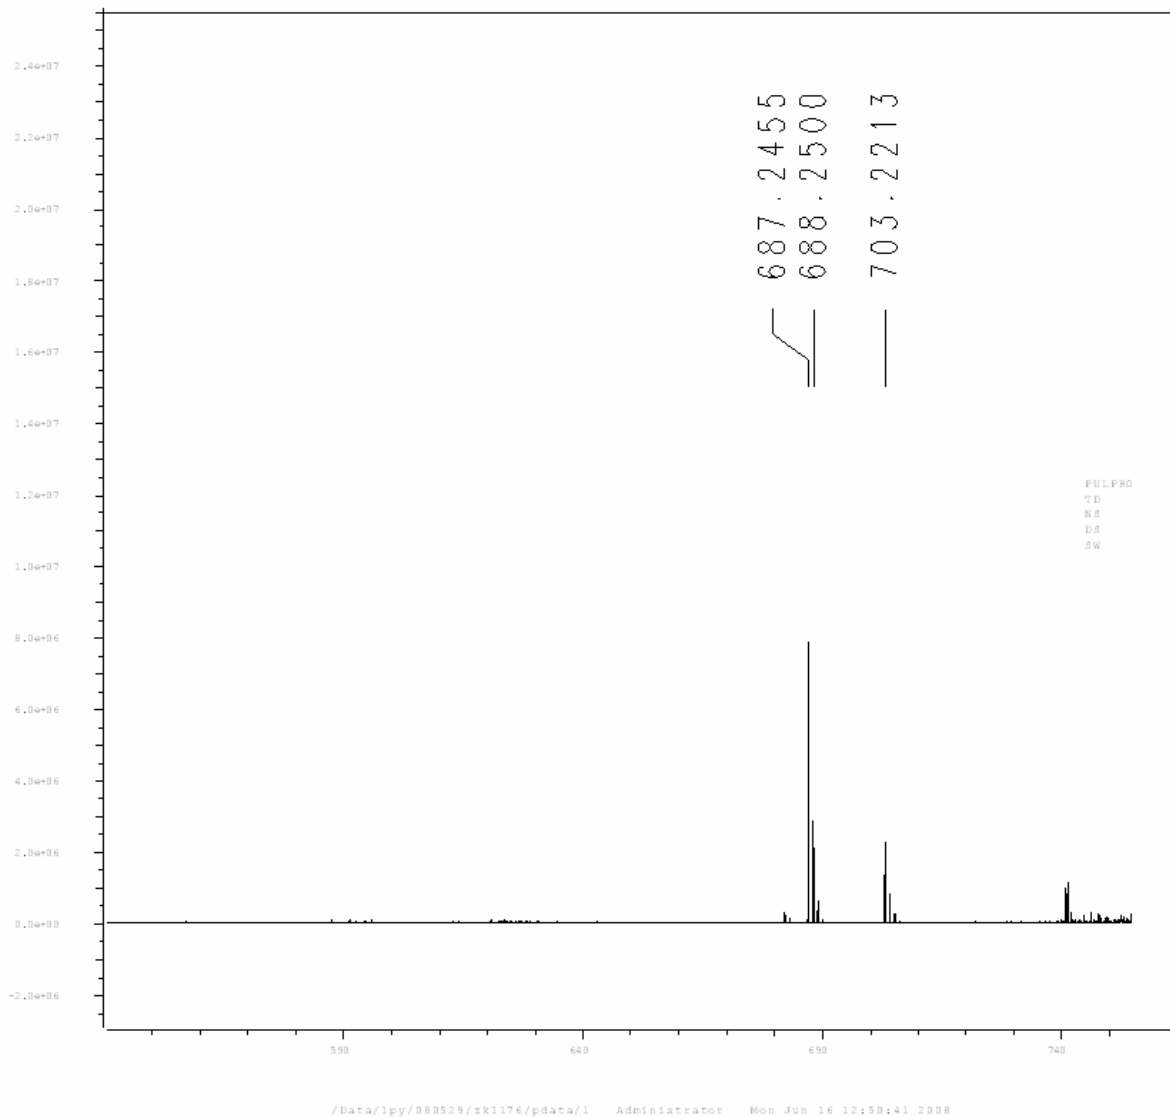

**Fig. S31.** HR-ESI<sup>+</sup>-MS of **2c** in acetonitrile/methanol. Assignment of main peaks:  $m/z$  calcd for [**2c** + Na]<sup>+</sup> C<sub>33</sub>H<sub>39</sub>N<sub>2</sub>O<sub>9</sub>F<sub>3</sub>Na, 687.2505, found 687.2455, error −7.3 ppm and calcd for [**2c** + K]<sup>+</sup> C<sub>33</sub>H<sub>39</sub>N<sub>2</sub>O<sub>9</sub>F<sub>3</sub>K 703.2245, found 703.2213, error −4.6 ppm.

10. ESI-MS spectra of equimolar acetonitrile solutions of **2a** with **3b** or **3c**

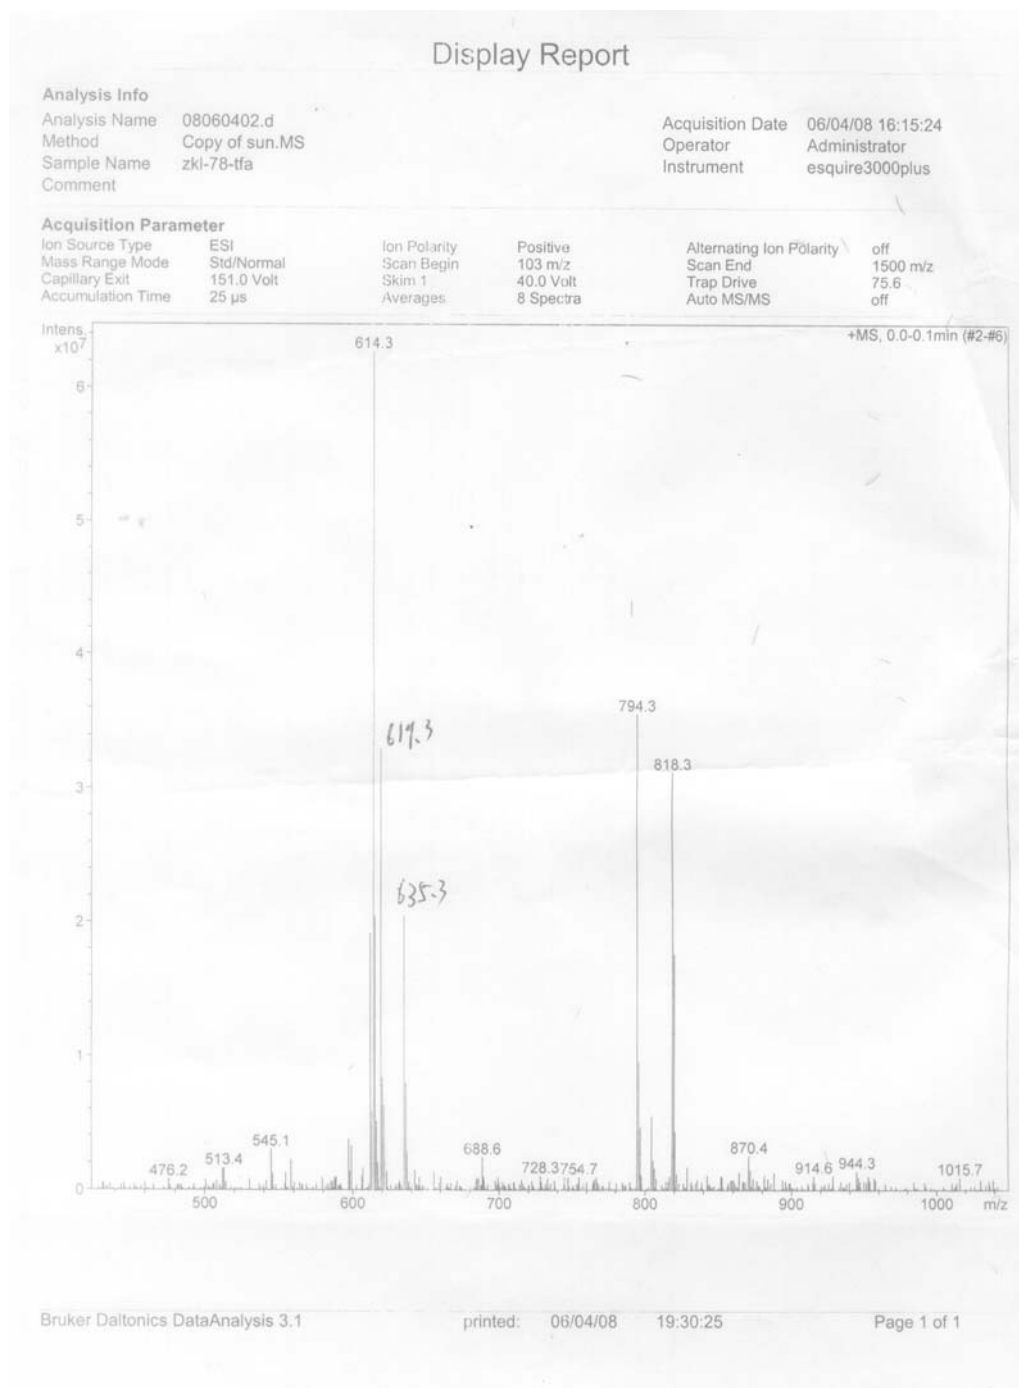

**Fig. S32.** ESI<sup>+</sup>-MS of a equimolar acetonitrile solution of **2a** and **3b**. Assignment of main peaks:  $m/z$  794.3 (60%) [**2a**•**3b** – CF<sub>3</sub>COO]<sup>+</sup>, 614.3 (100%) [**2a** + NH<sub>4</sub>]<sup>+</sup>, 619.3 (52%) [**2a** + Na]<sup>+</sup> and 635.2 (35%) [**2a** + K]<sup>+</sup>.

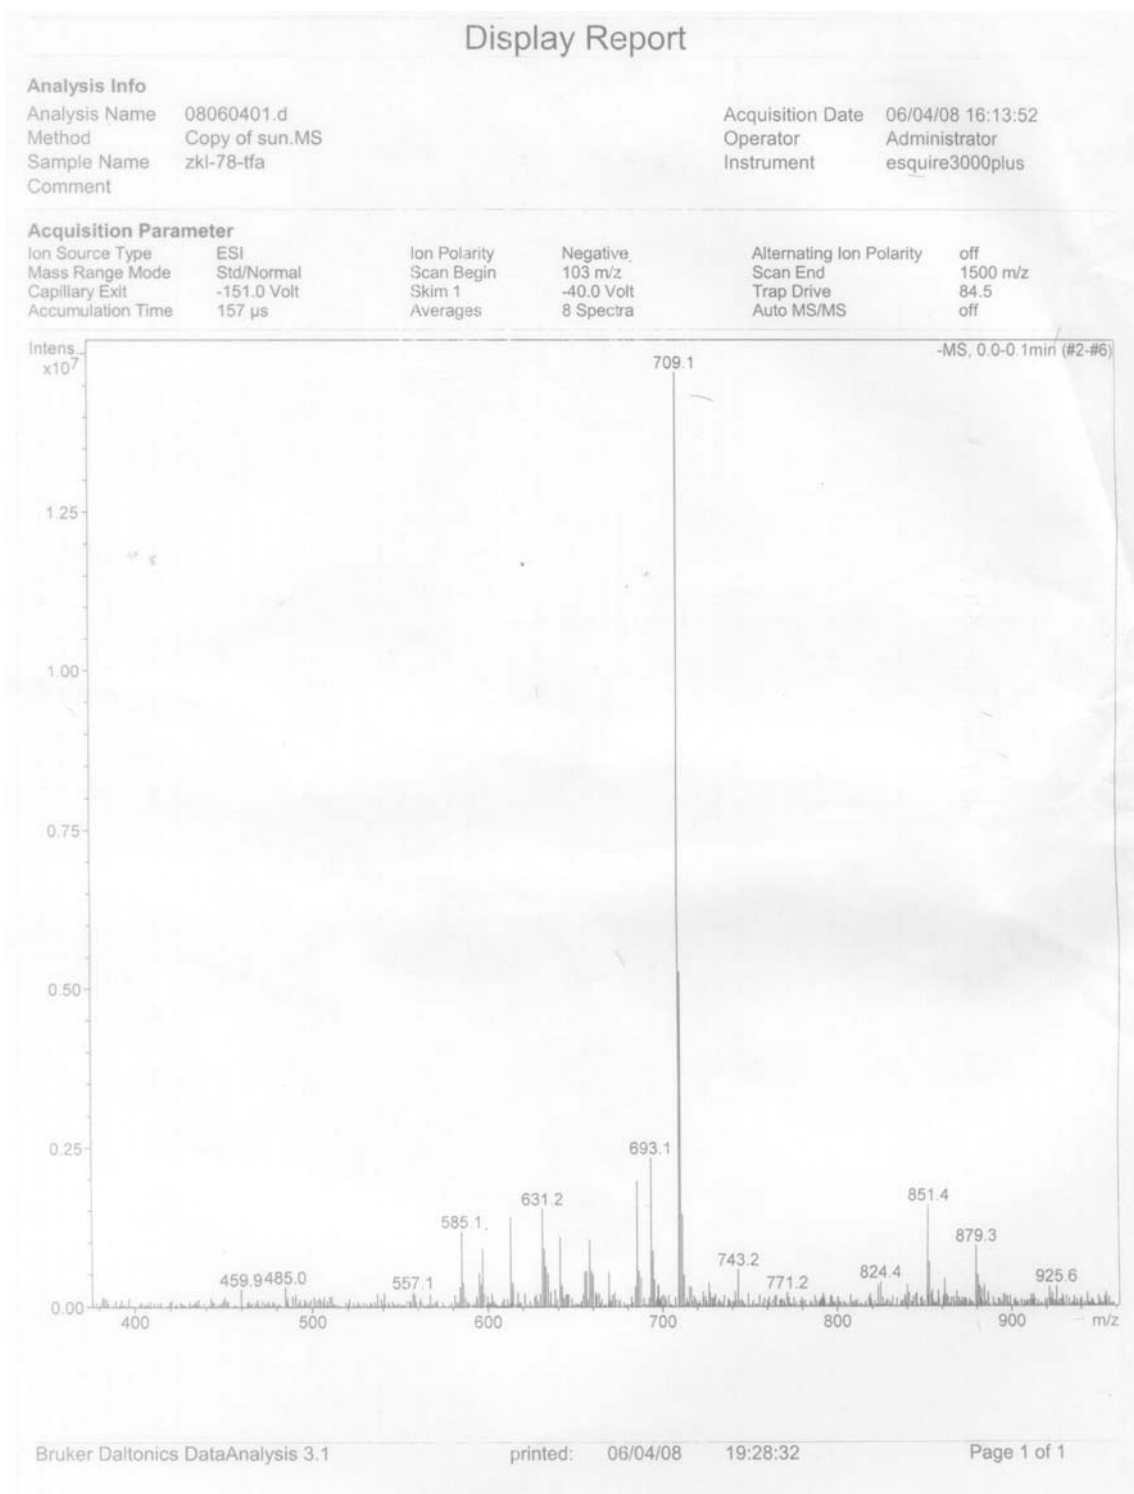

**Fig. S33.** ESI-MS of a equimolar acetonitrile solution of **2a** and **3b**. Assignment of main peaks: 709.1 (100%) [**2a** + CF<sub>3</sub>COO]<sup>-</sup>.



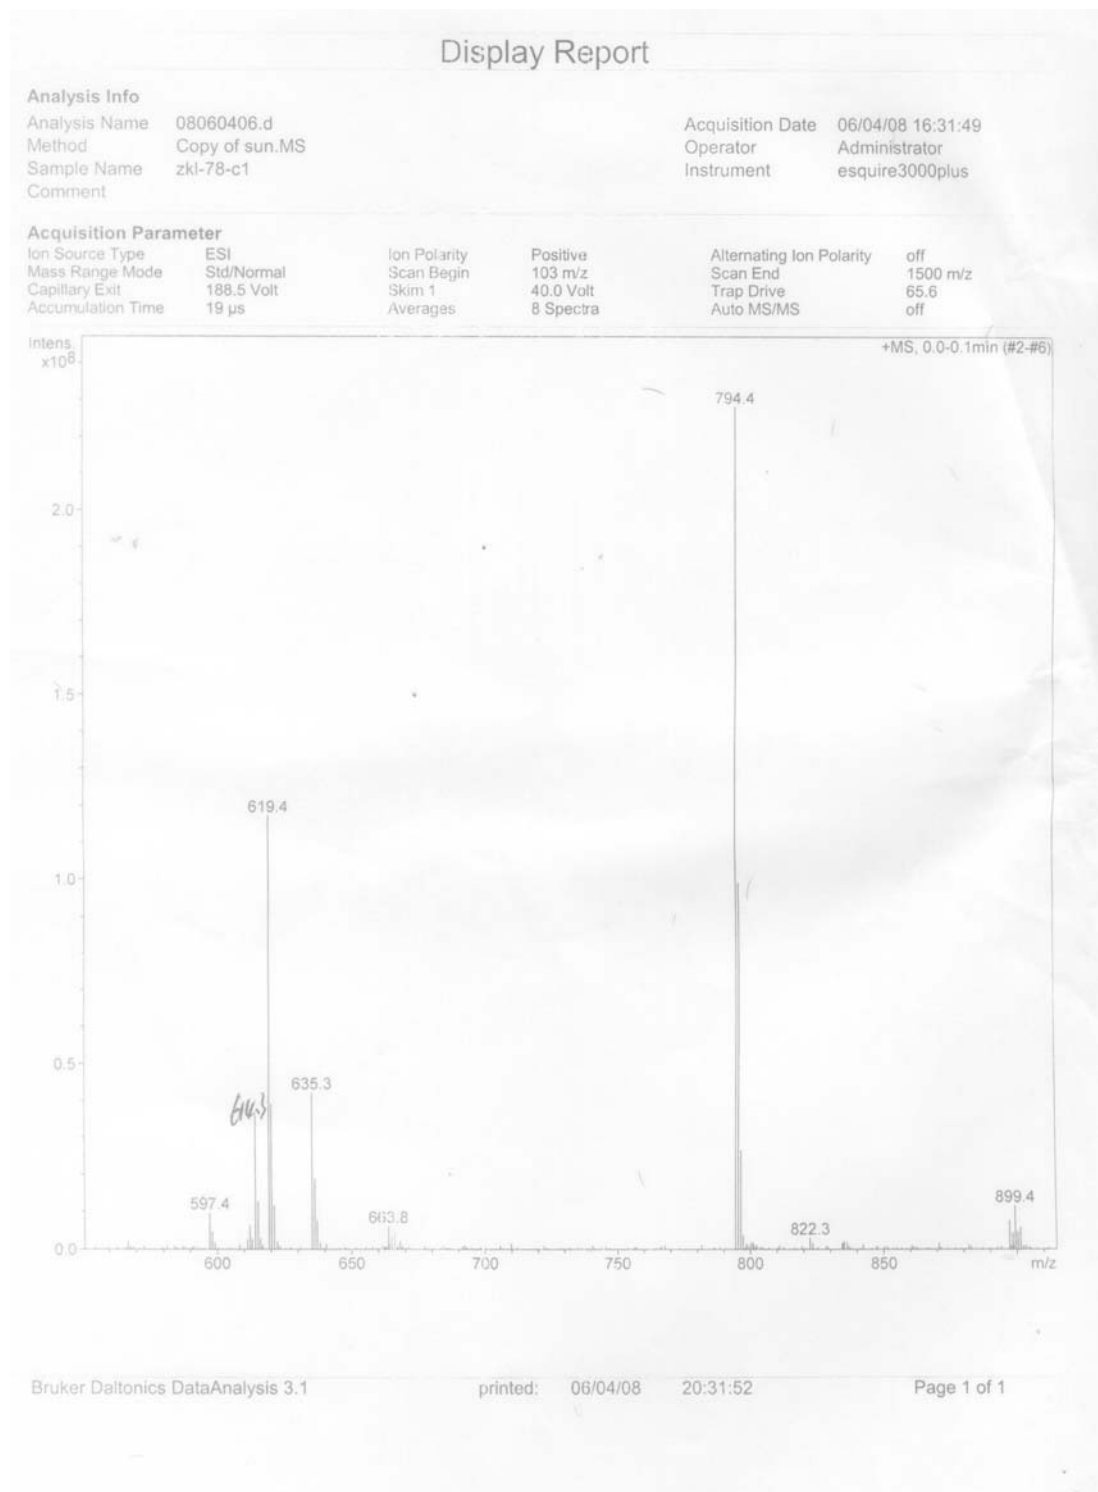

**Fig. S34.** ESI<sup>+</sup>-MS of a equimolar acetonitrile solution of **2a** and **3c**. Assignment of main peaks:  $m/z$  794.3 (100%) [**2a**•**3b** – Cl]<sup>+</sup>, 614.3 (17%) [**2a** + NH<sub>4</sub>]<sup>+</sup>, 619.3 (52%) [**2a** + Na]<sup>+</sup> and 635.2 (20%) [**2a** + K]<sup>+</sup>.

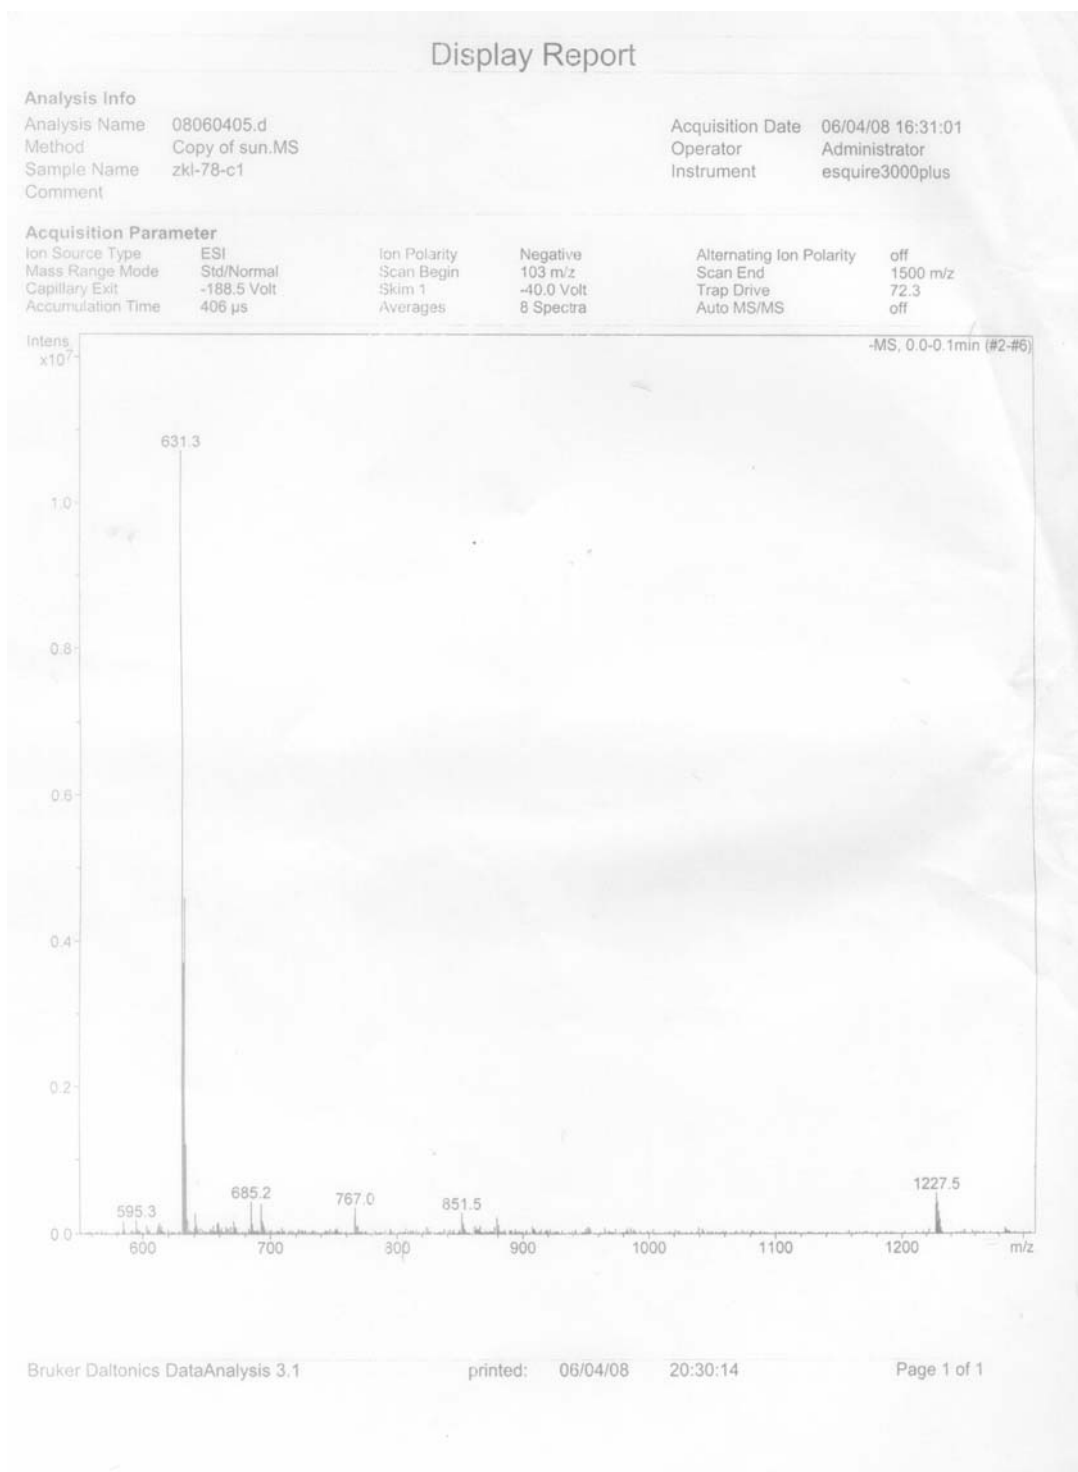

**Fig. S35.** ESI-MS of a equimolar acetonitrile solution of **2a** and **3c**. Assignment of main peaks: 631.3 (100%) [**2a** + Cl]<sup>-</sup> and 1227.5 (10%) for [**2a** + **2a** + Cl]<sup>-</sup>.

- (S1) S. J. Loeb and A. D. Tramontozzi, *Org. Biomol. Chem.*, 2005, **3**, 1393.
- (S2) P. R. Ashton, E. J. T. Chrystal, P. Glink, T. S. Menzer, C. Schiavo, N. Spencer, J. F. Stoddart, P. A. Tasker, A. J. P. White and D. J. Williams, *Chem. Eur. J.*, 1996, **2**, 709.
- (S3) J. W. Jones and H. W. Gibson, *J. Am. Chem. Soc.*, 2003, **125**, 7001.
- (S4) H. W. Gibson, D. S. Nagvekar, N. Yamaguchi, F. Wang and S. W. Bryant, *J. Org. Chem.*, 1997, **62**, 4798.
